# Supplementary material
Source: PubMed Central journal article supplement (PMC5312707)

# Supplemental Figure 1: Detailed heavy chain plasmablast genetics

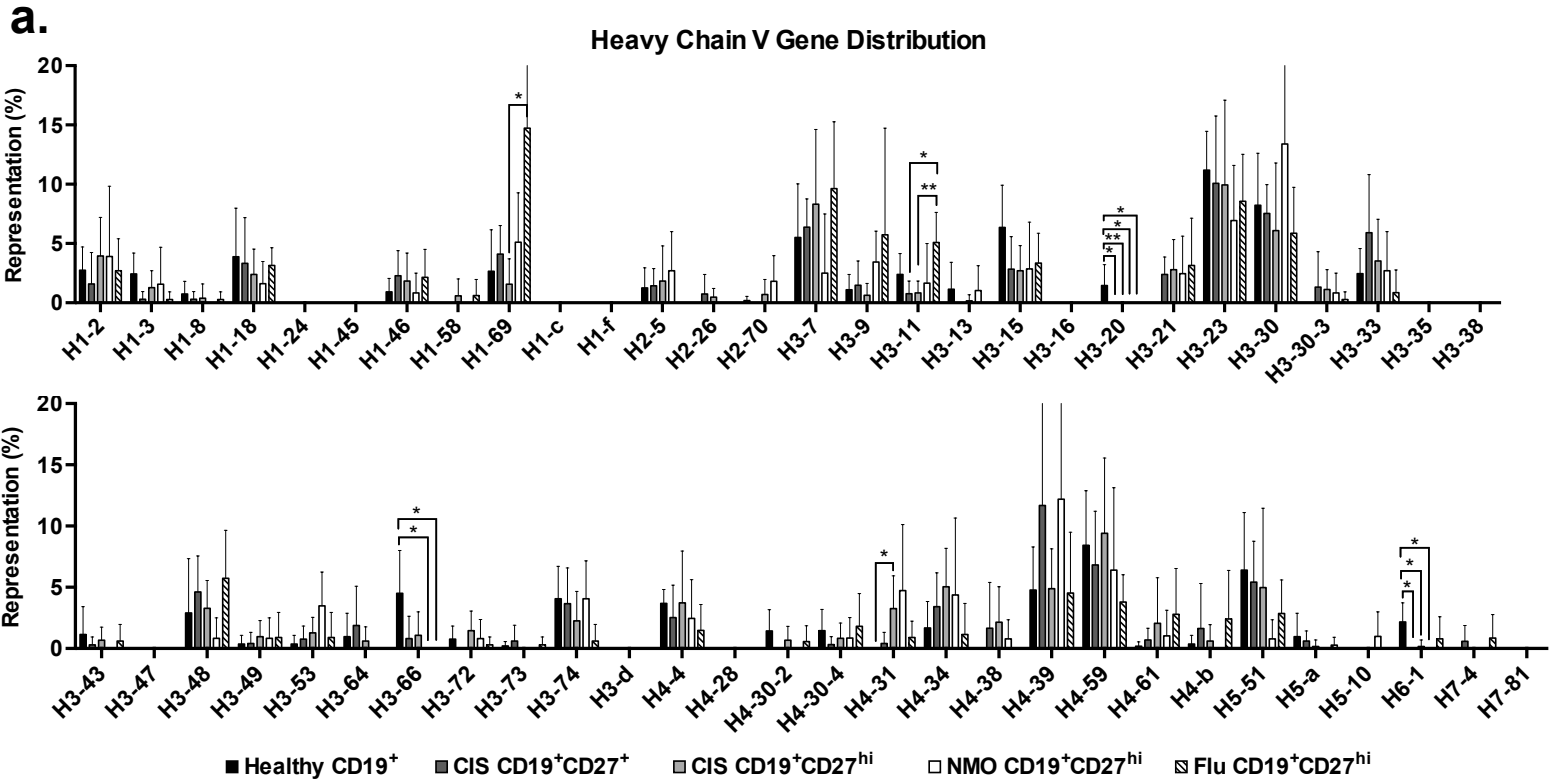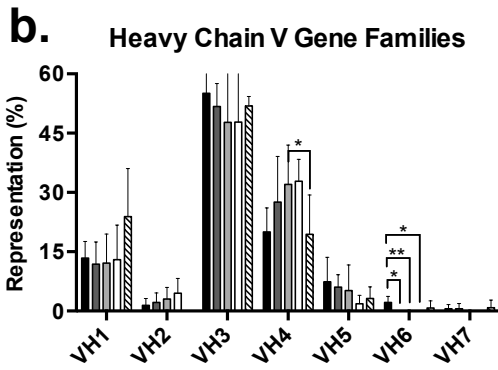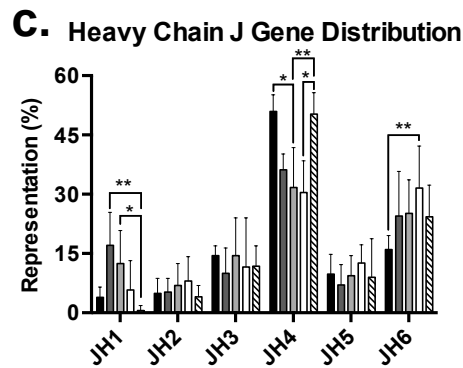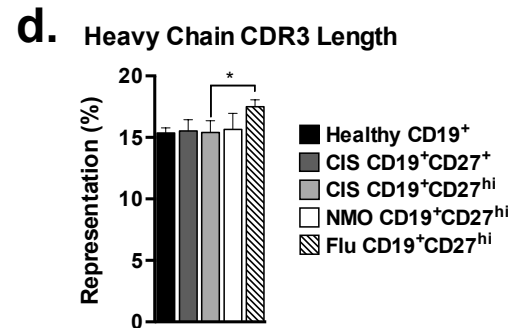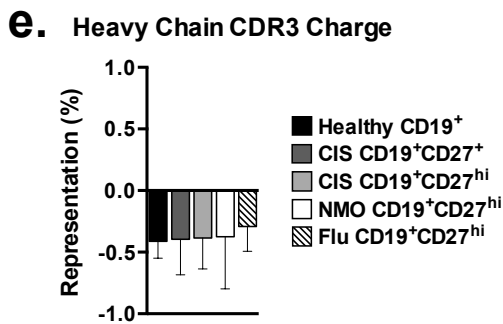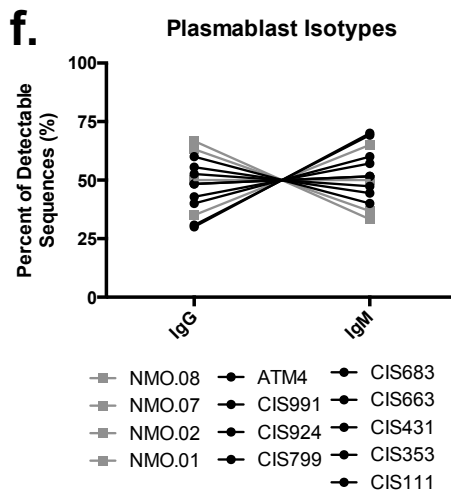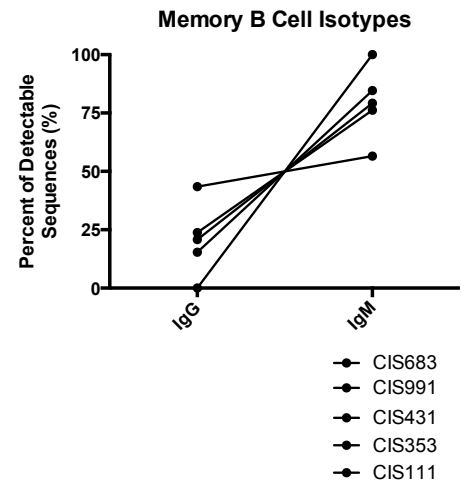

# Supplemental Figure 2: Detailed heavy chain plasmablast genetics

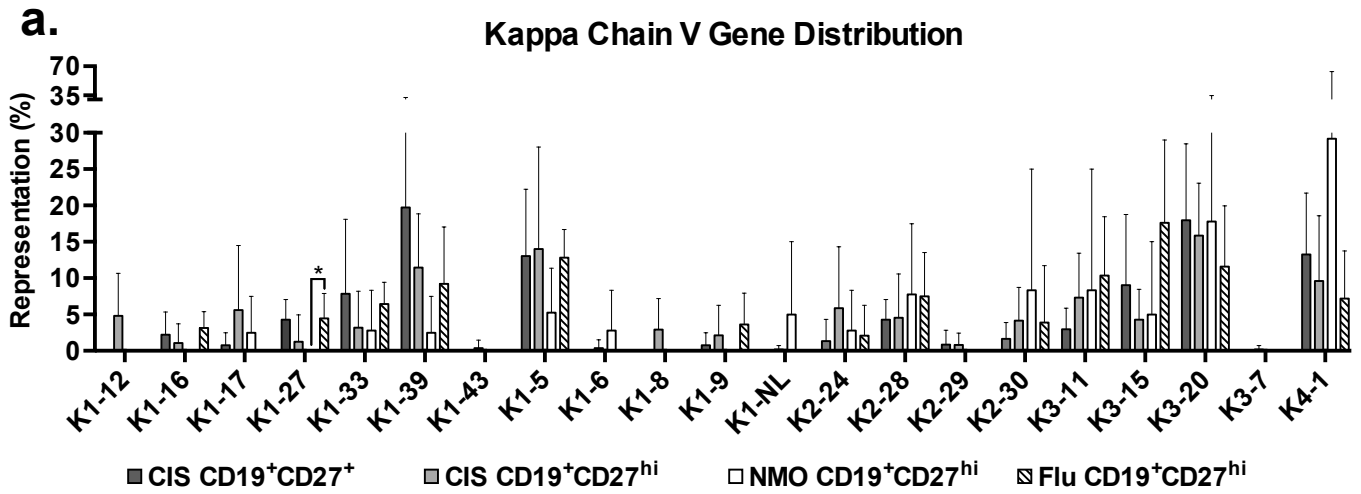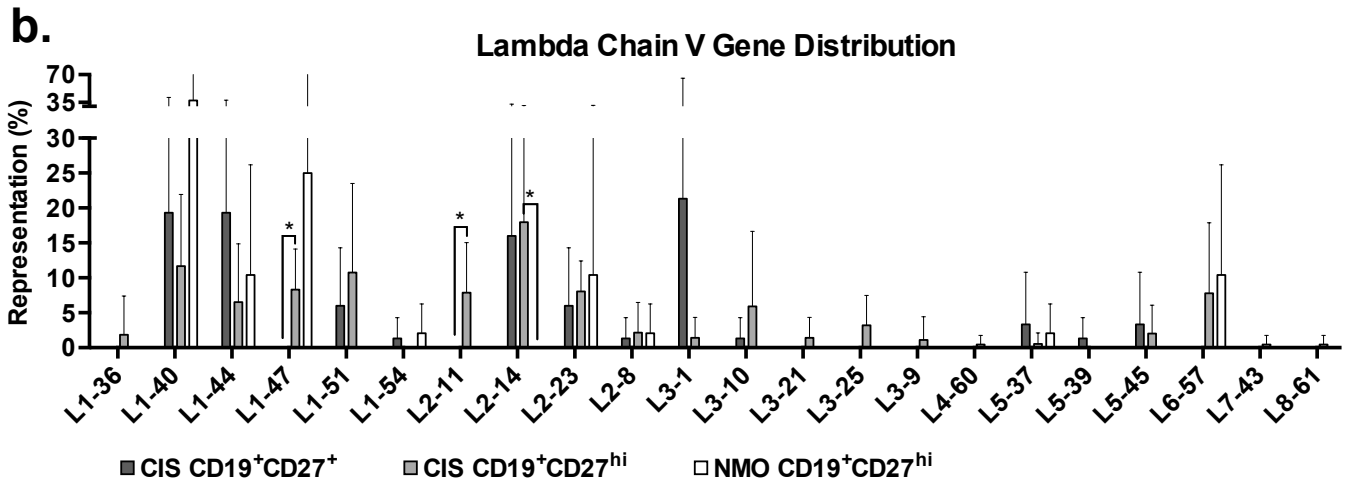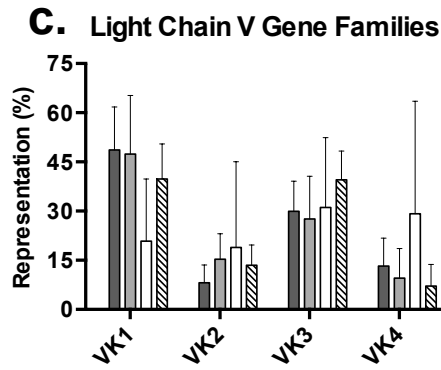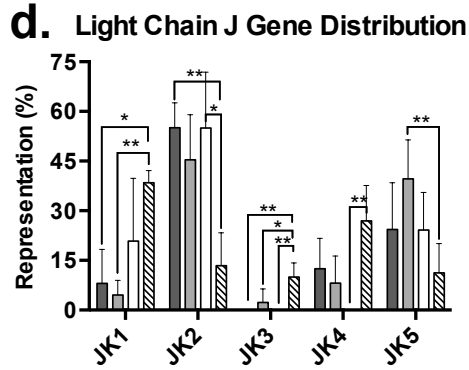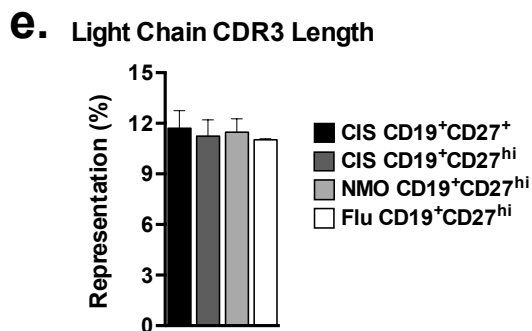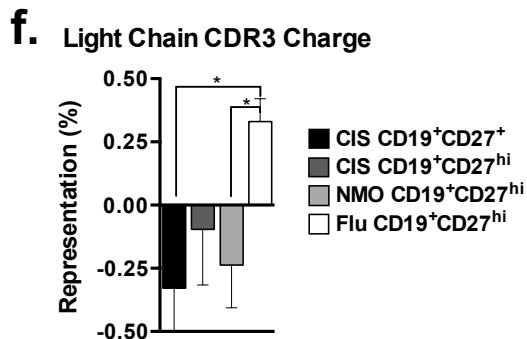



# Supplemental Figure 3: Other tissue lysate ELISAs

## a. Human Brain Lysate

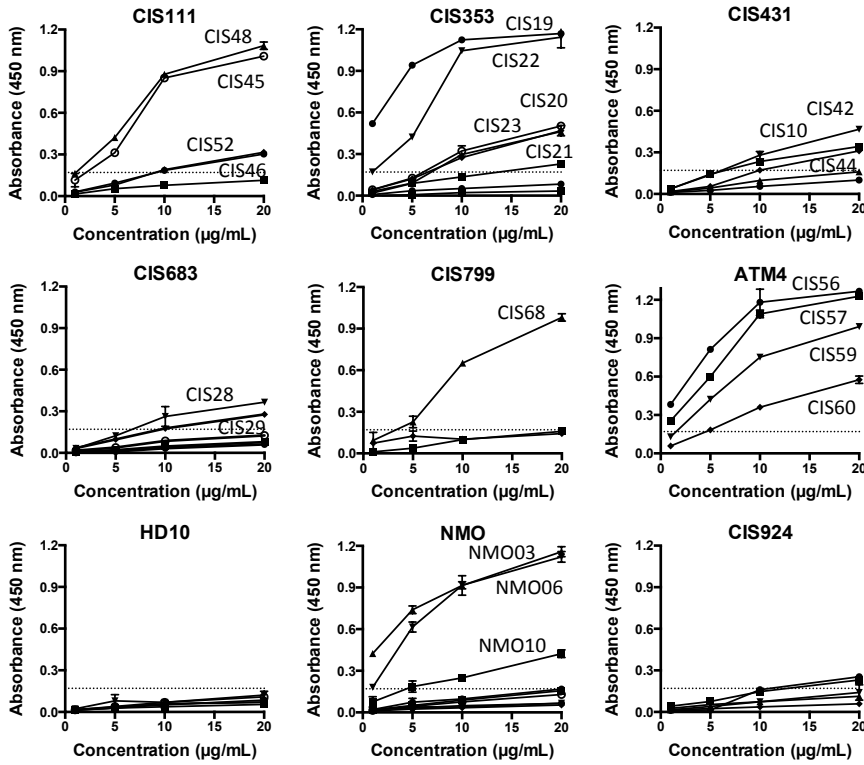

## b.

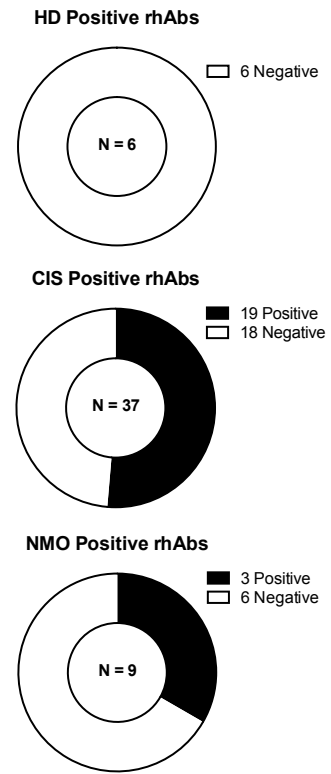

## c. Kidney Lysate

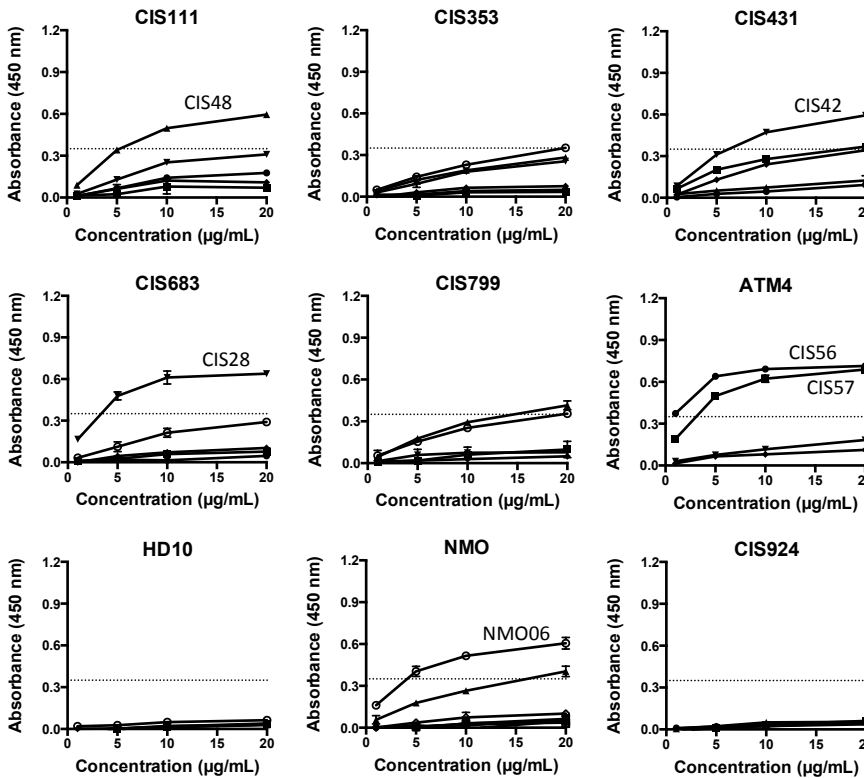

## d.

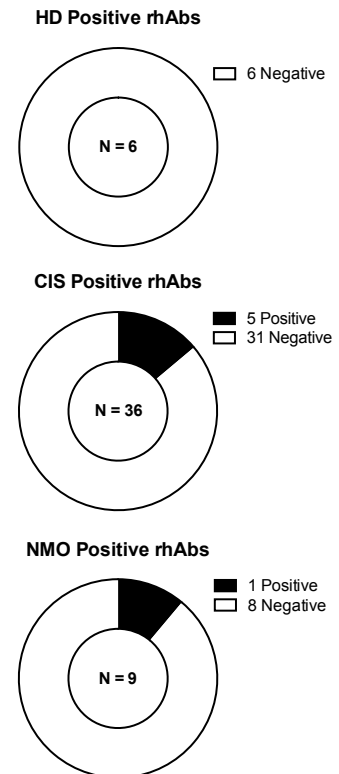

# Supplemental Figure 4: Foreign antigen and irrelevant antigen ELISAs

## a. H1N1 Influenza

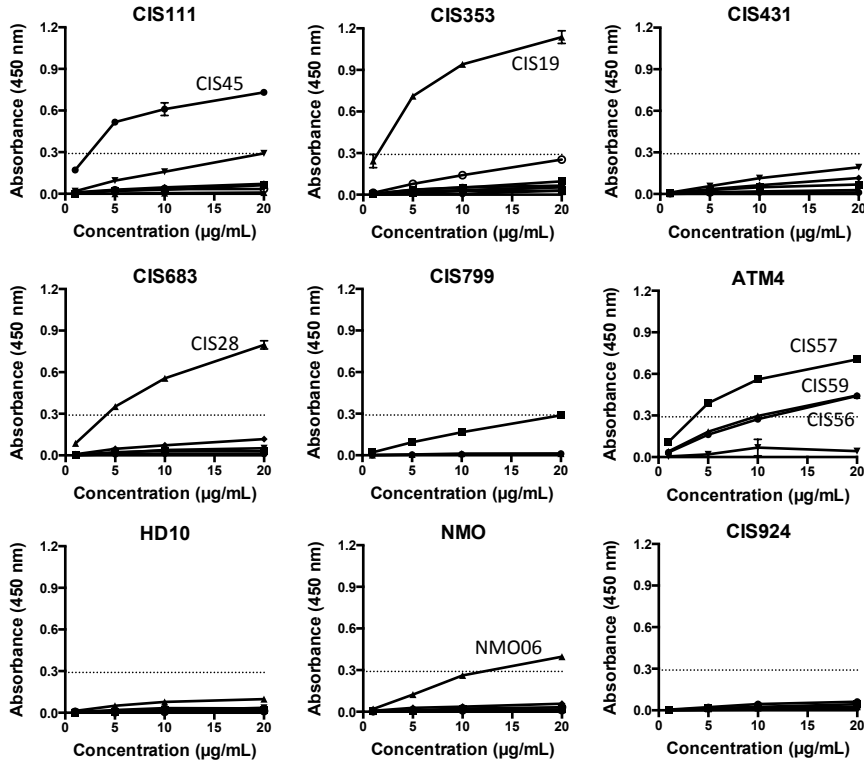

## b.

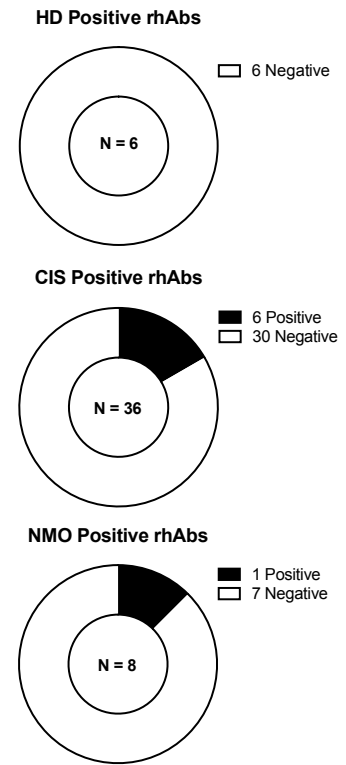

## c. Ovalbumin

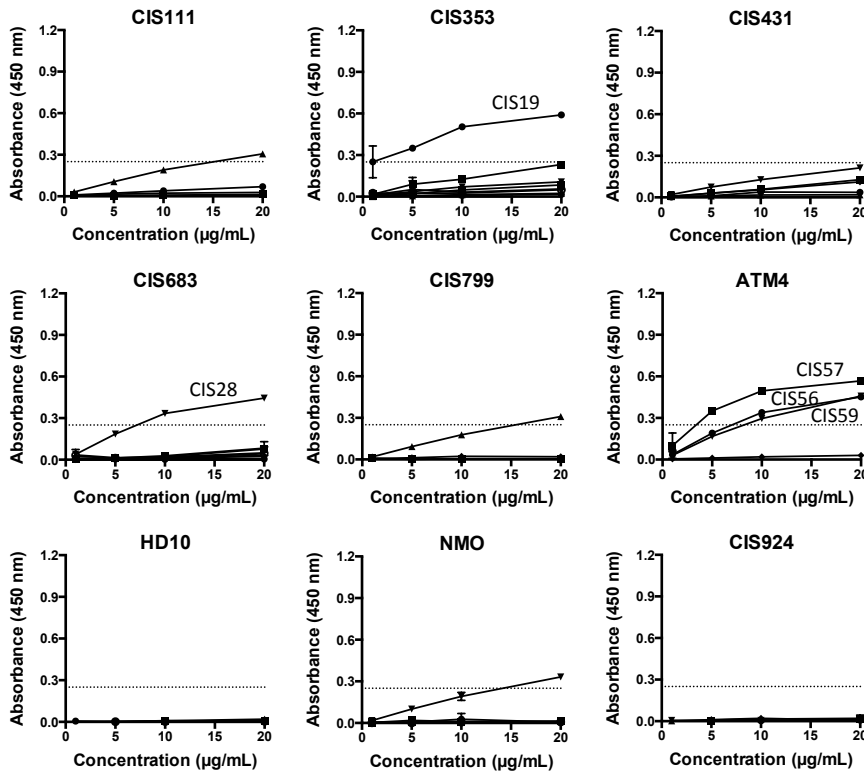

## d.

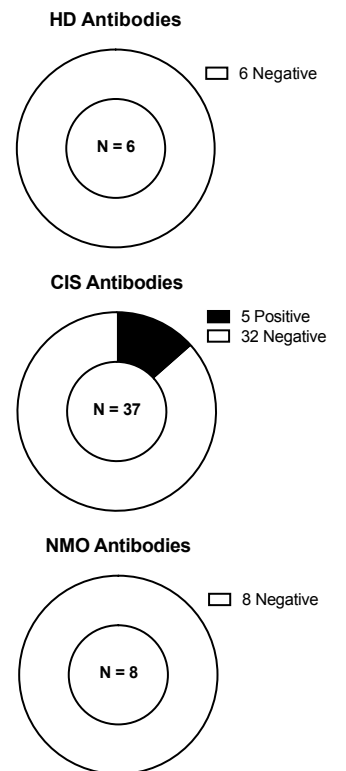

# Supplemental Figure 5: Neuroblastoma Lysate ELISAs

## a. SH-Sy5y Lysate

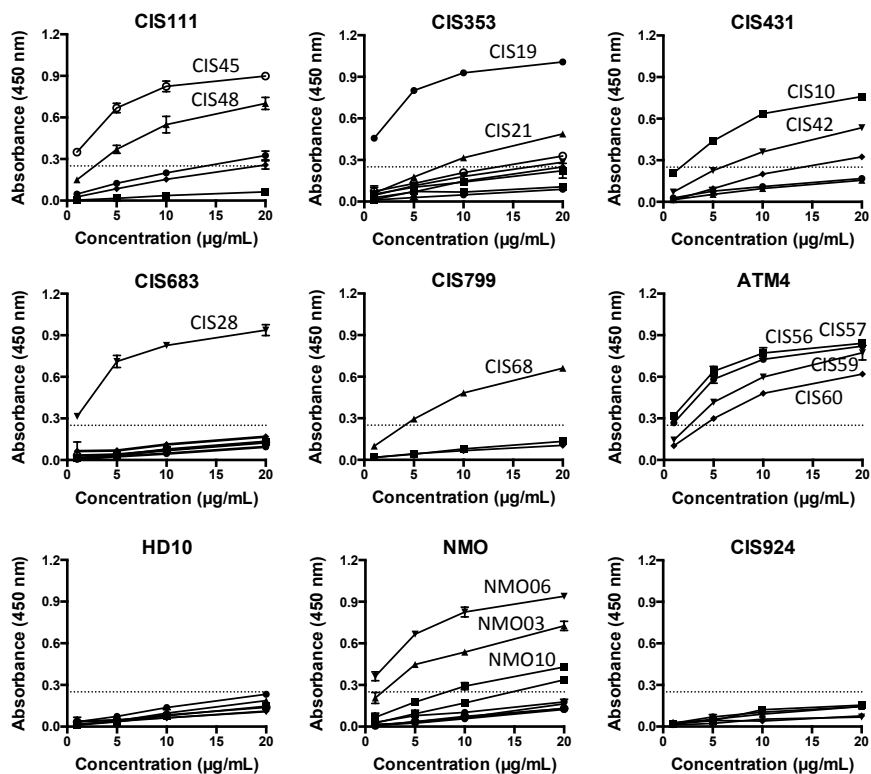

## b.

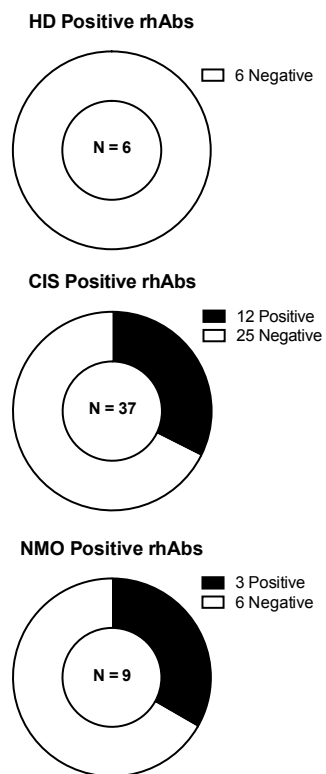

Supplemental Figure 6: Plasmablast rhAbs on stroke corpus callosum

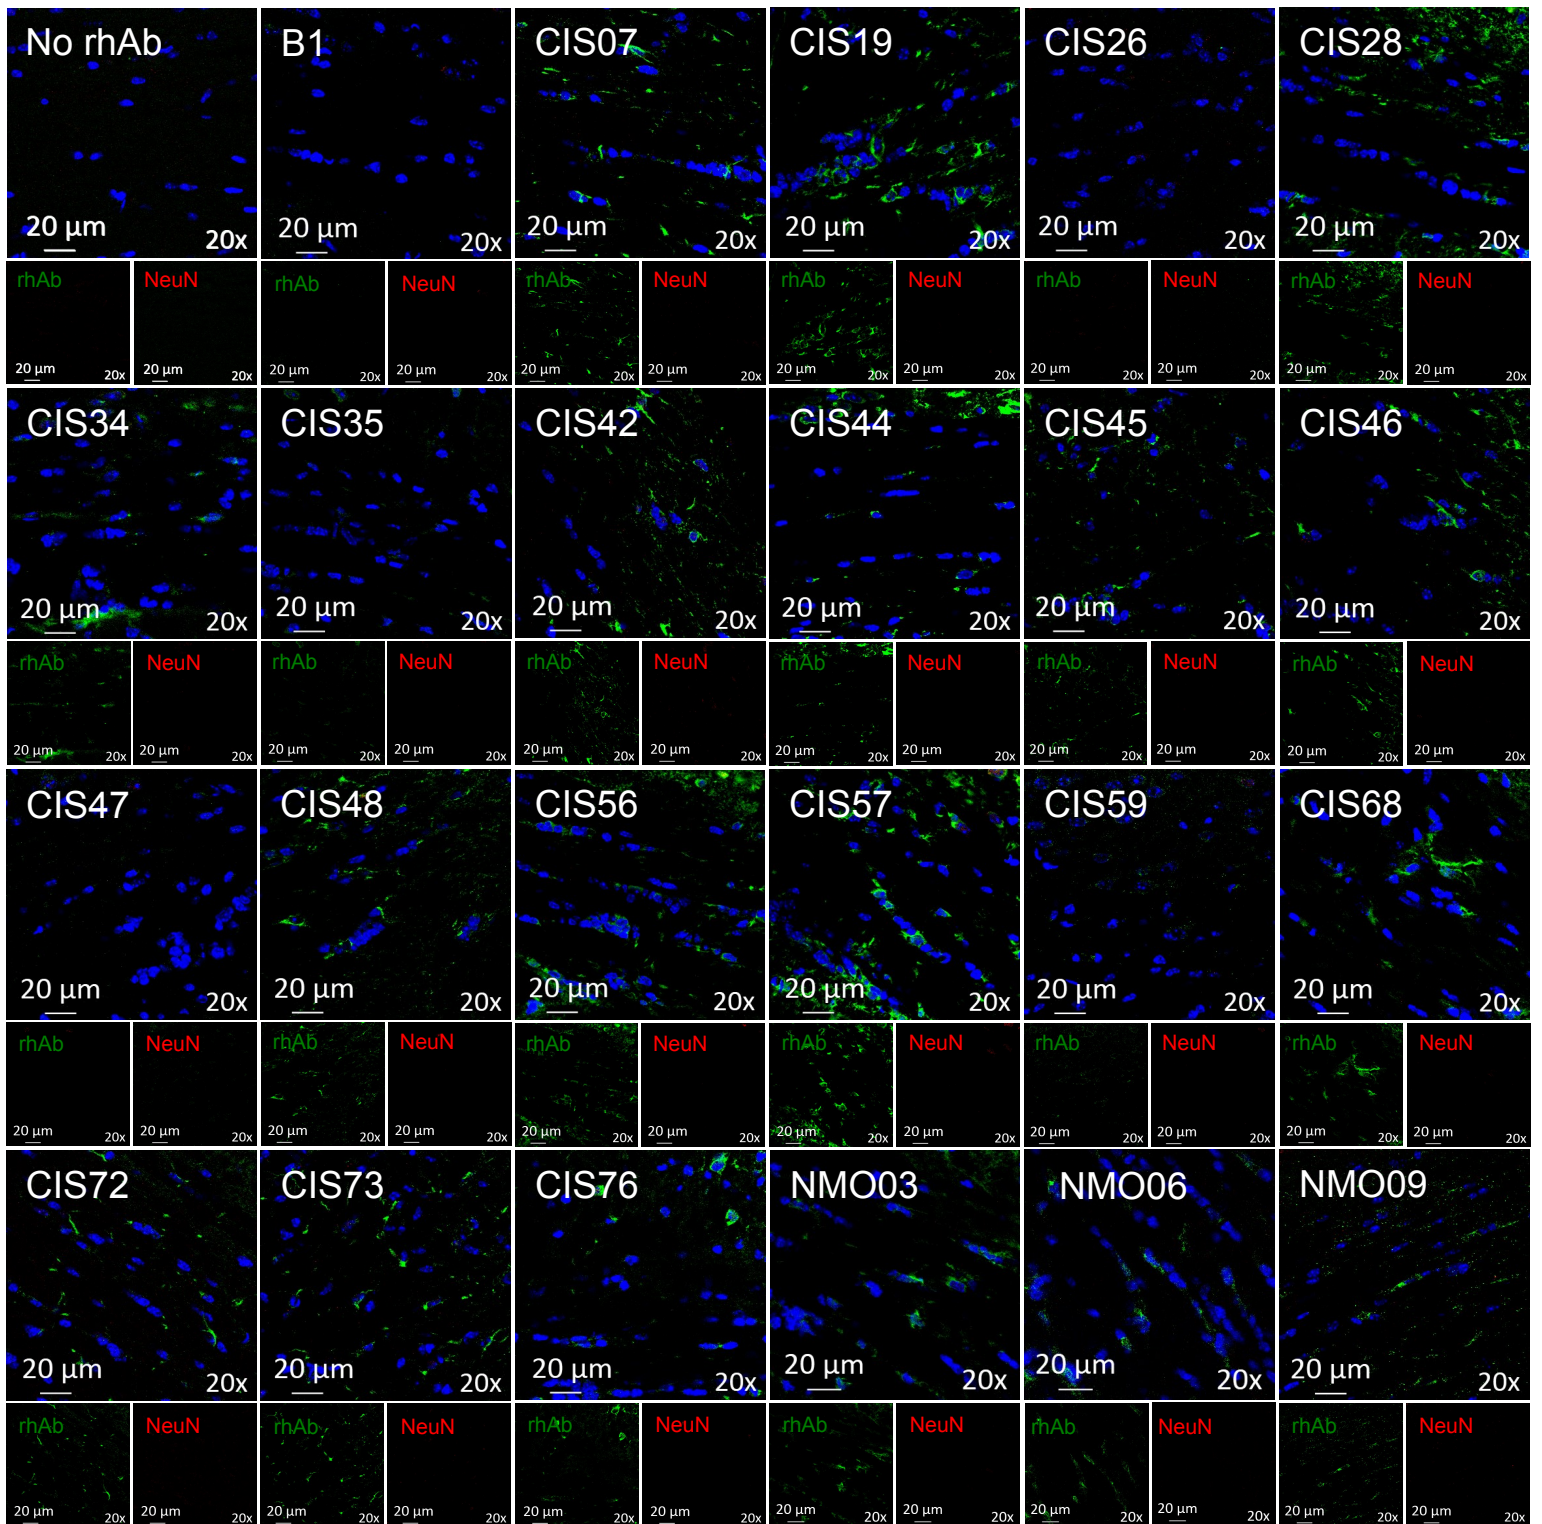



Supplemental Figure 7: Plasmablast rhAbs on stroke cortex

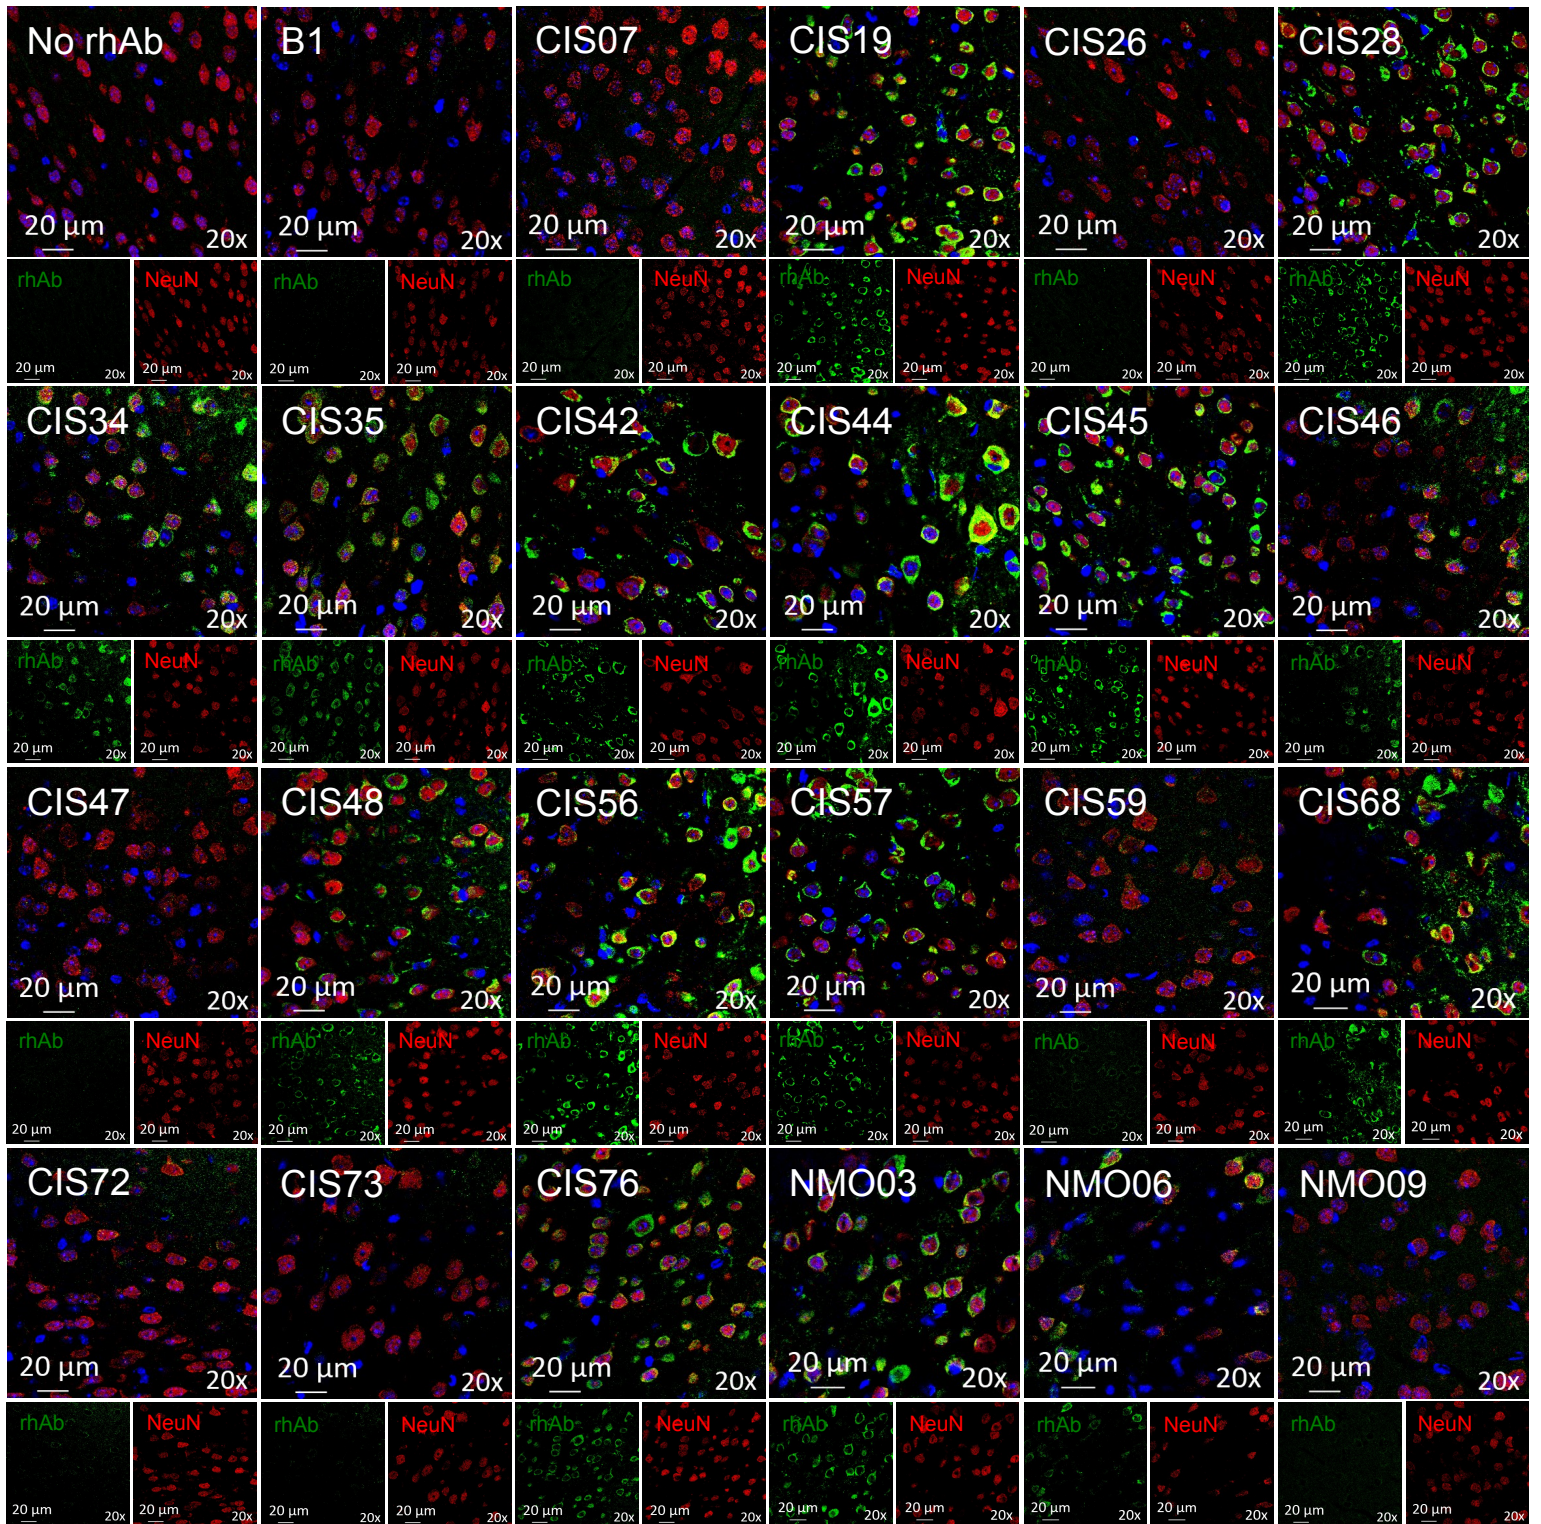



# Supplemental Figure 8: Plasmablast rhAbs on EAE corpus callosum

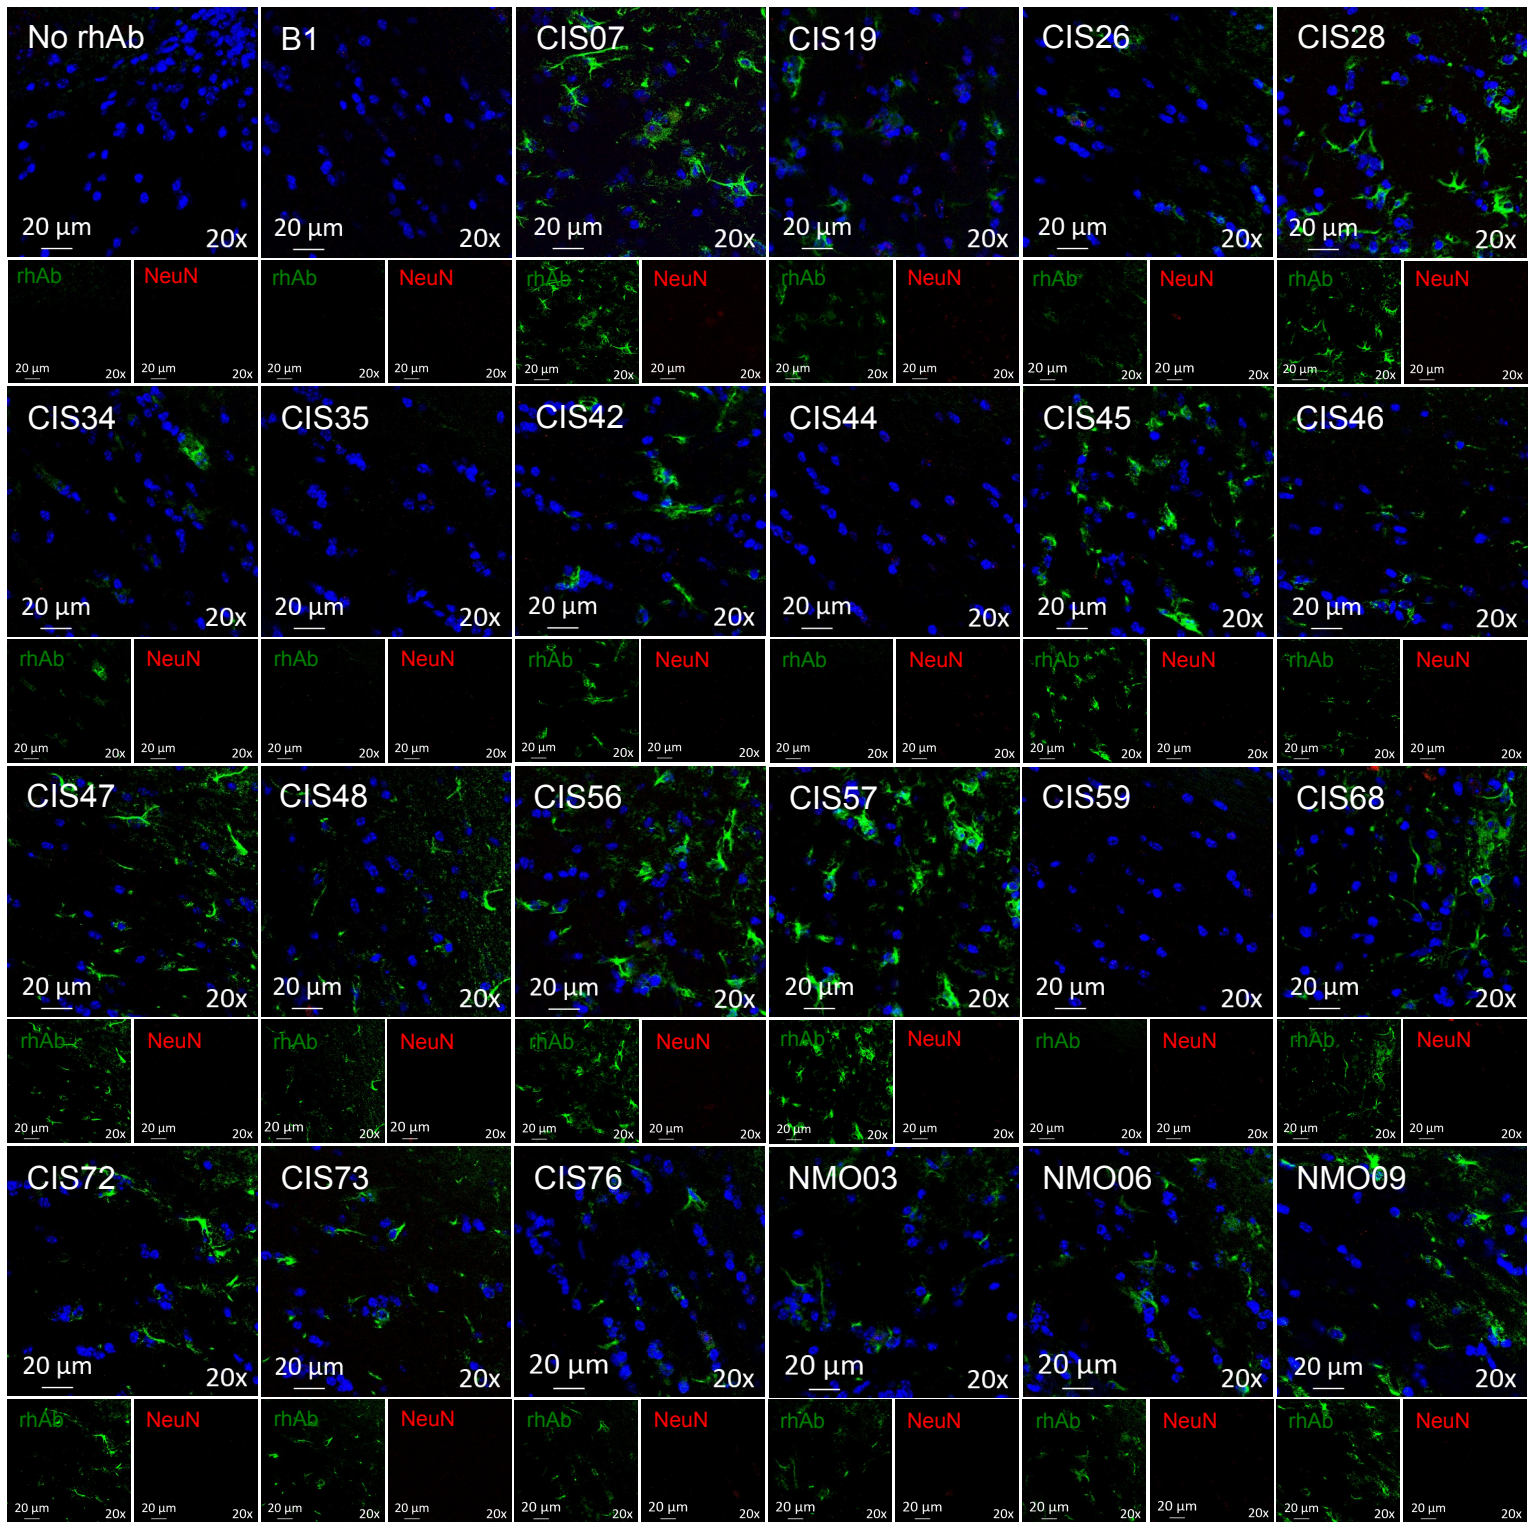



# Supplemental Figure 9: Plasmablast rhAbs on EAE cortex

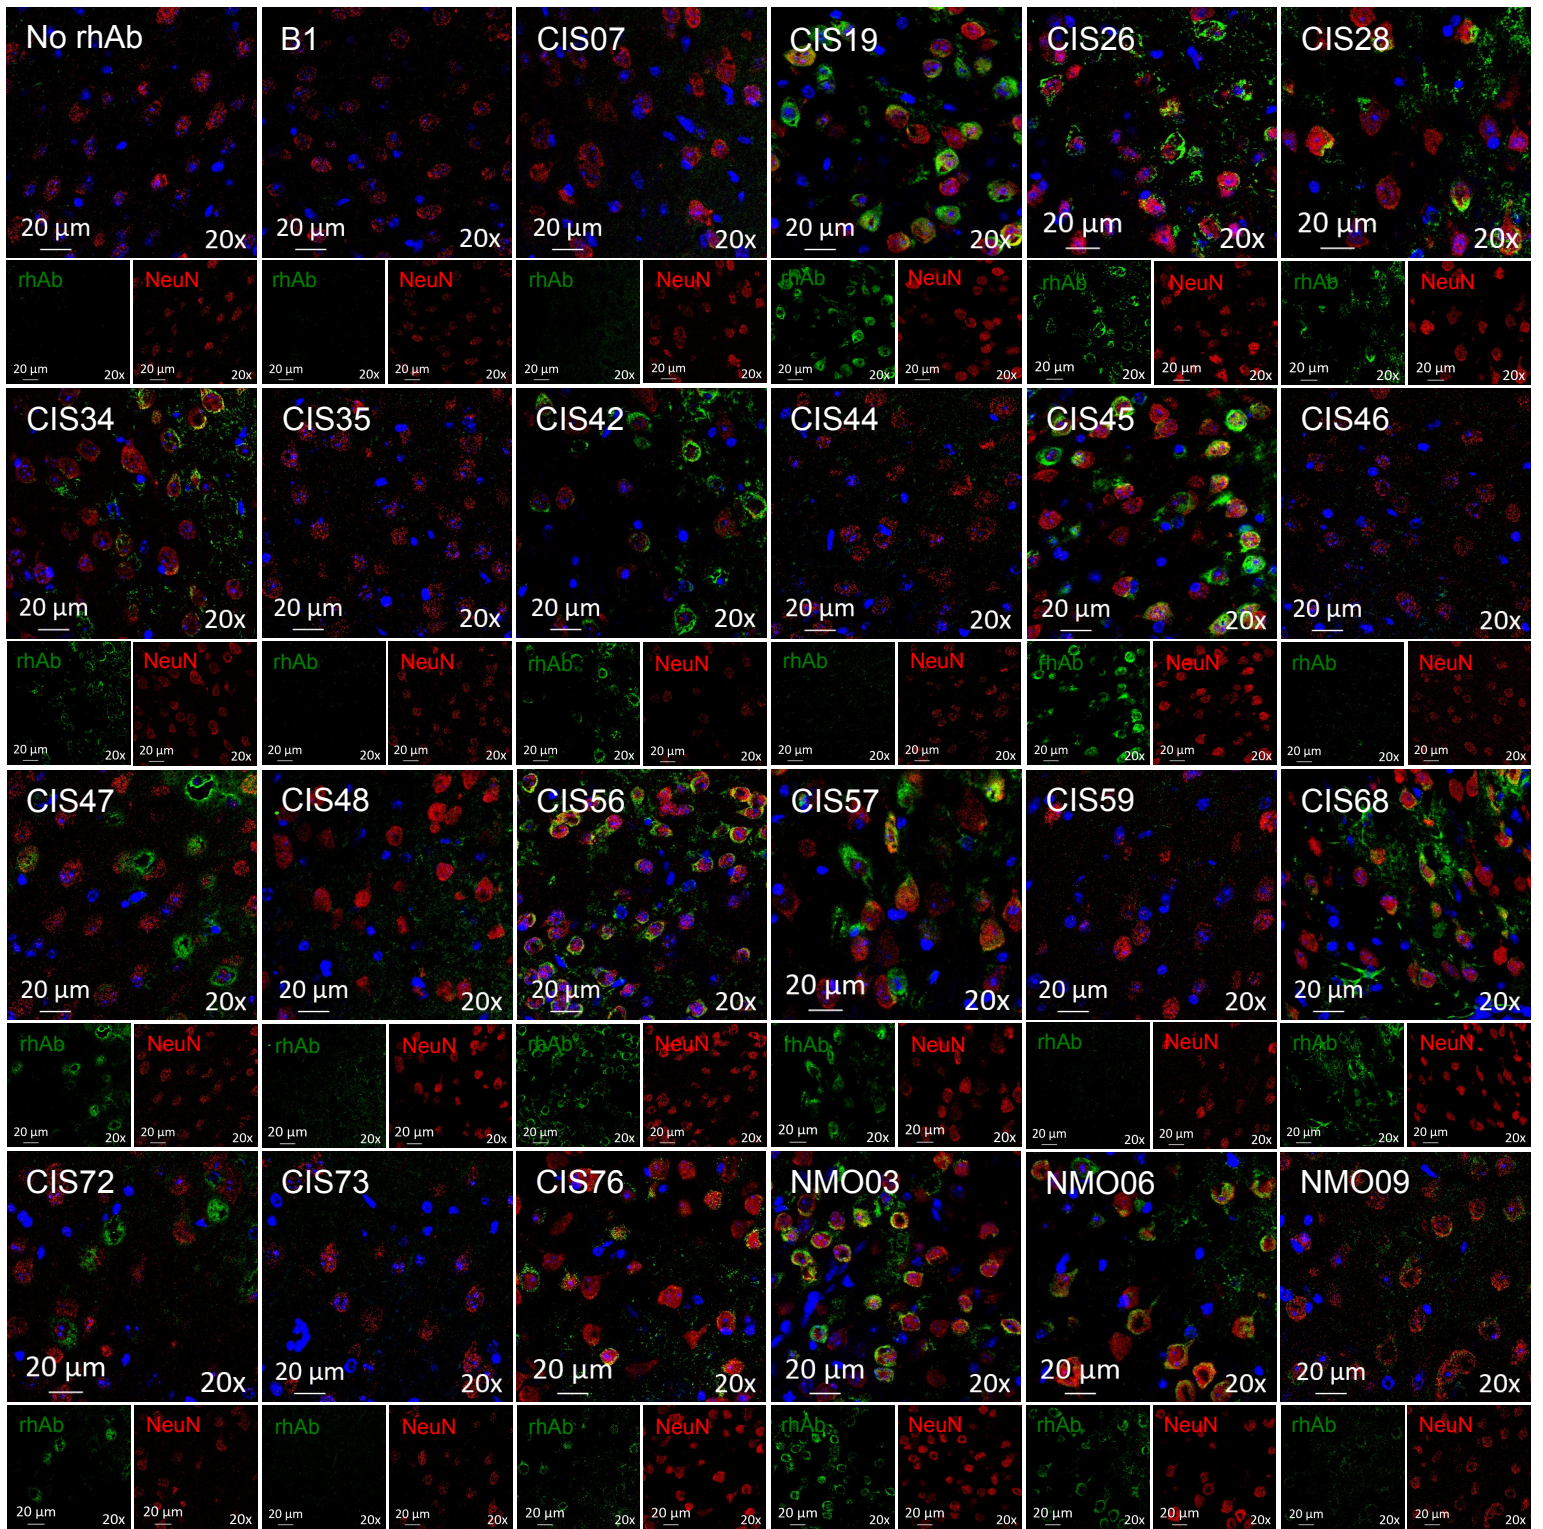



Supplemental Figure 10: Plasmablast rhAbs on healthy corpus callosum

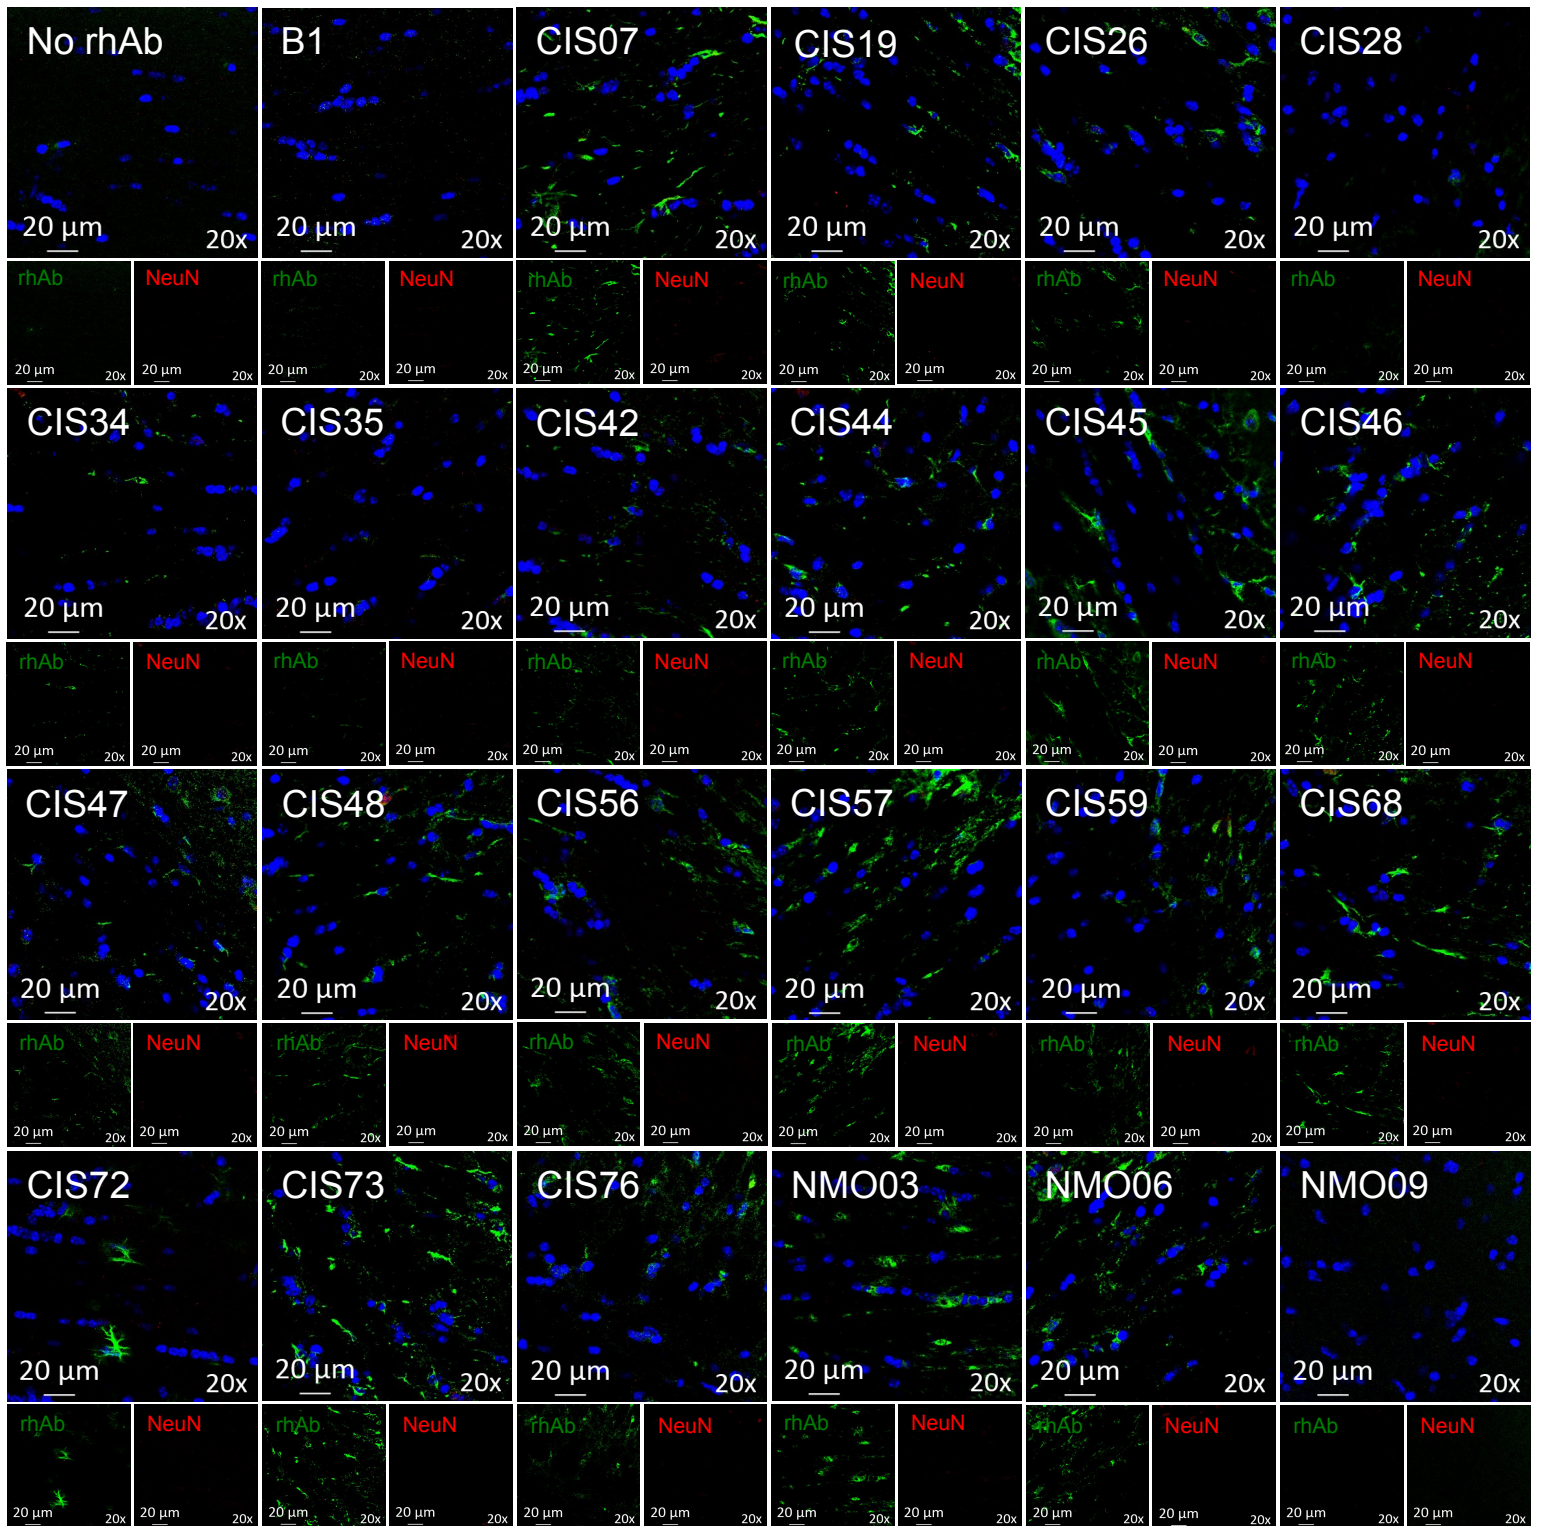



Supplemental Figure 11: Plasmablast rhAbs on healthy cortex

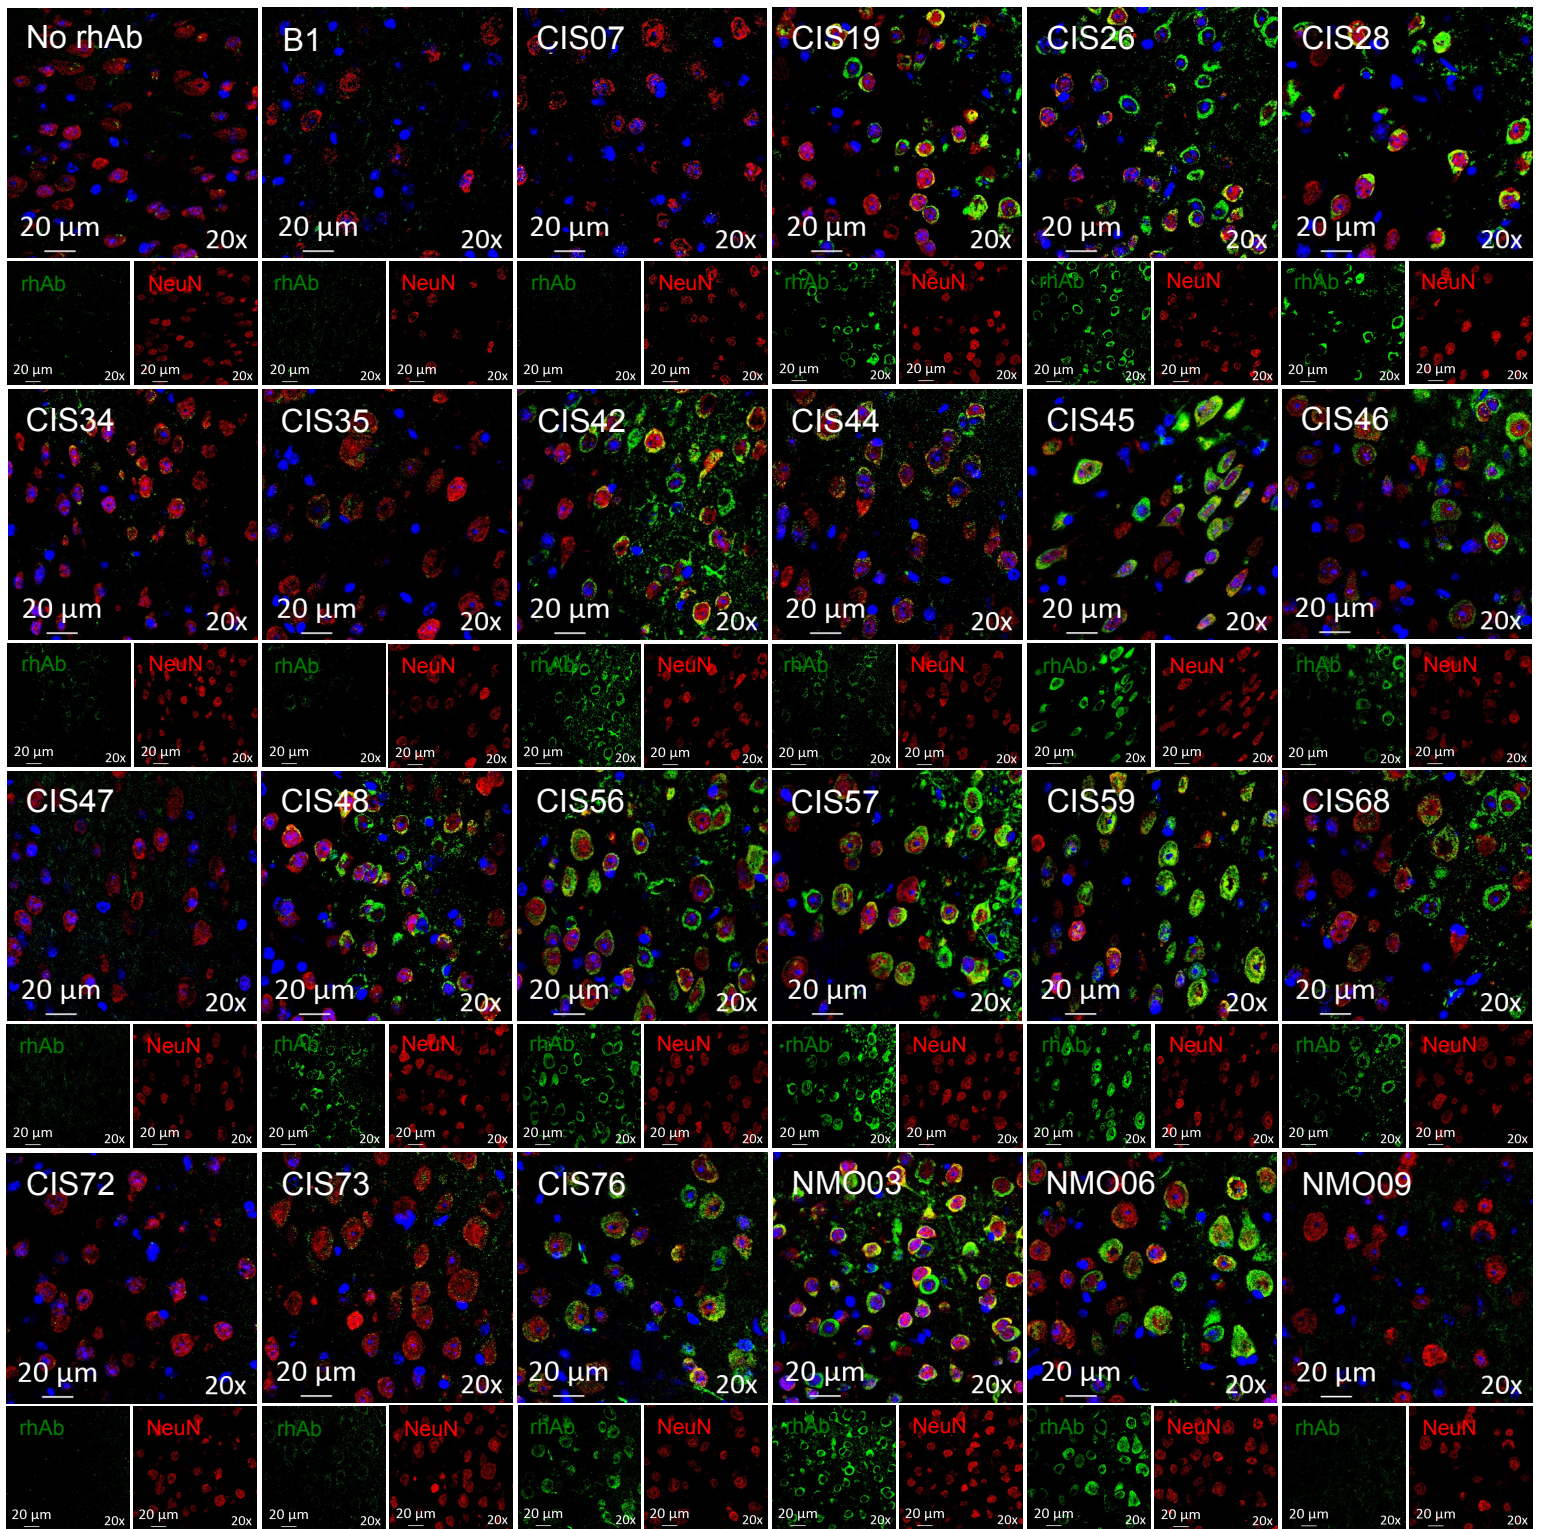



Supplemental Figure 12: Plasmablast rhAbs with astrocyte marker

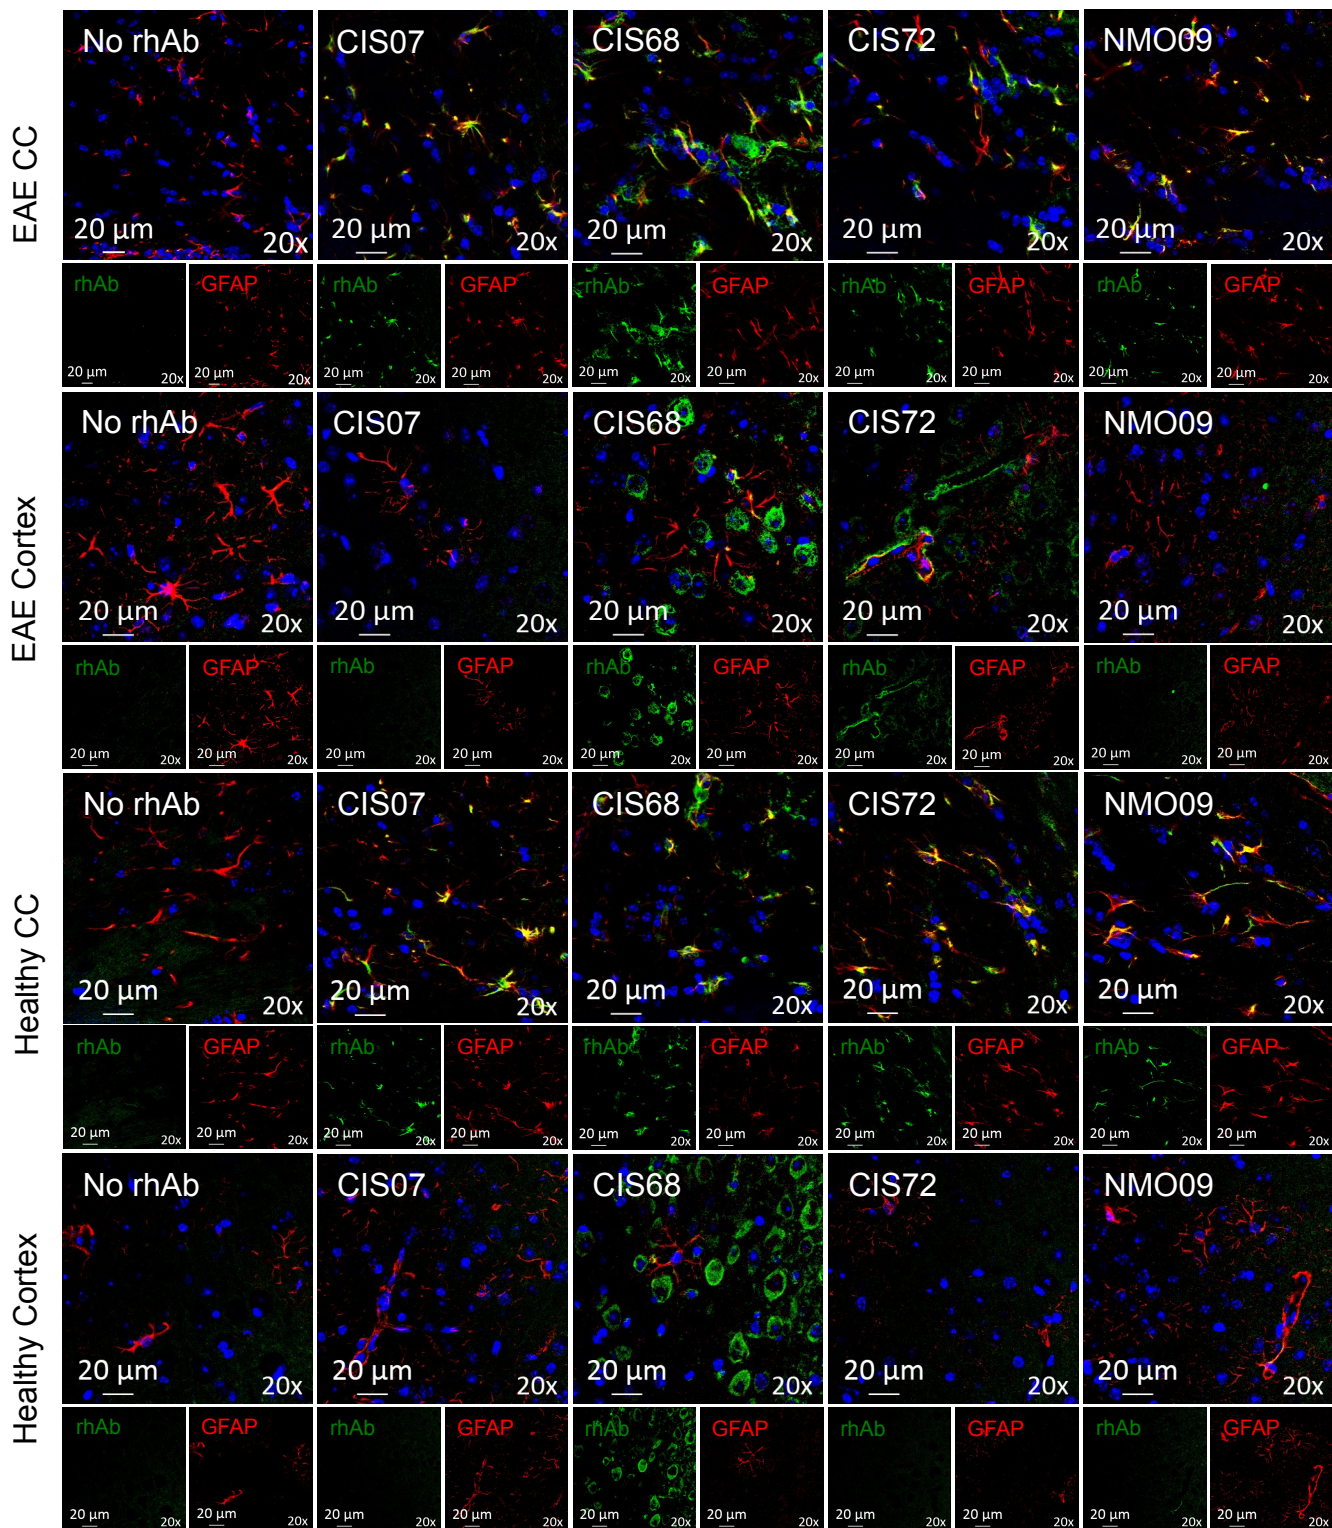



Supplemental Figure 13: Plasmablast rhAbs with oligodendrocyte marker

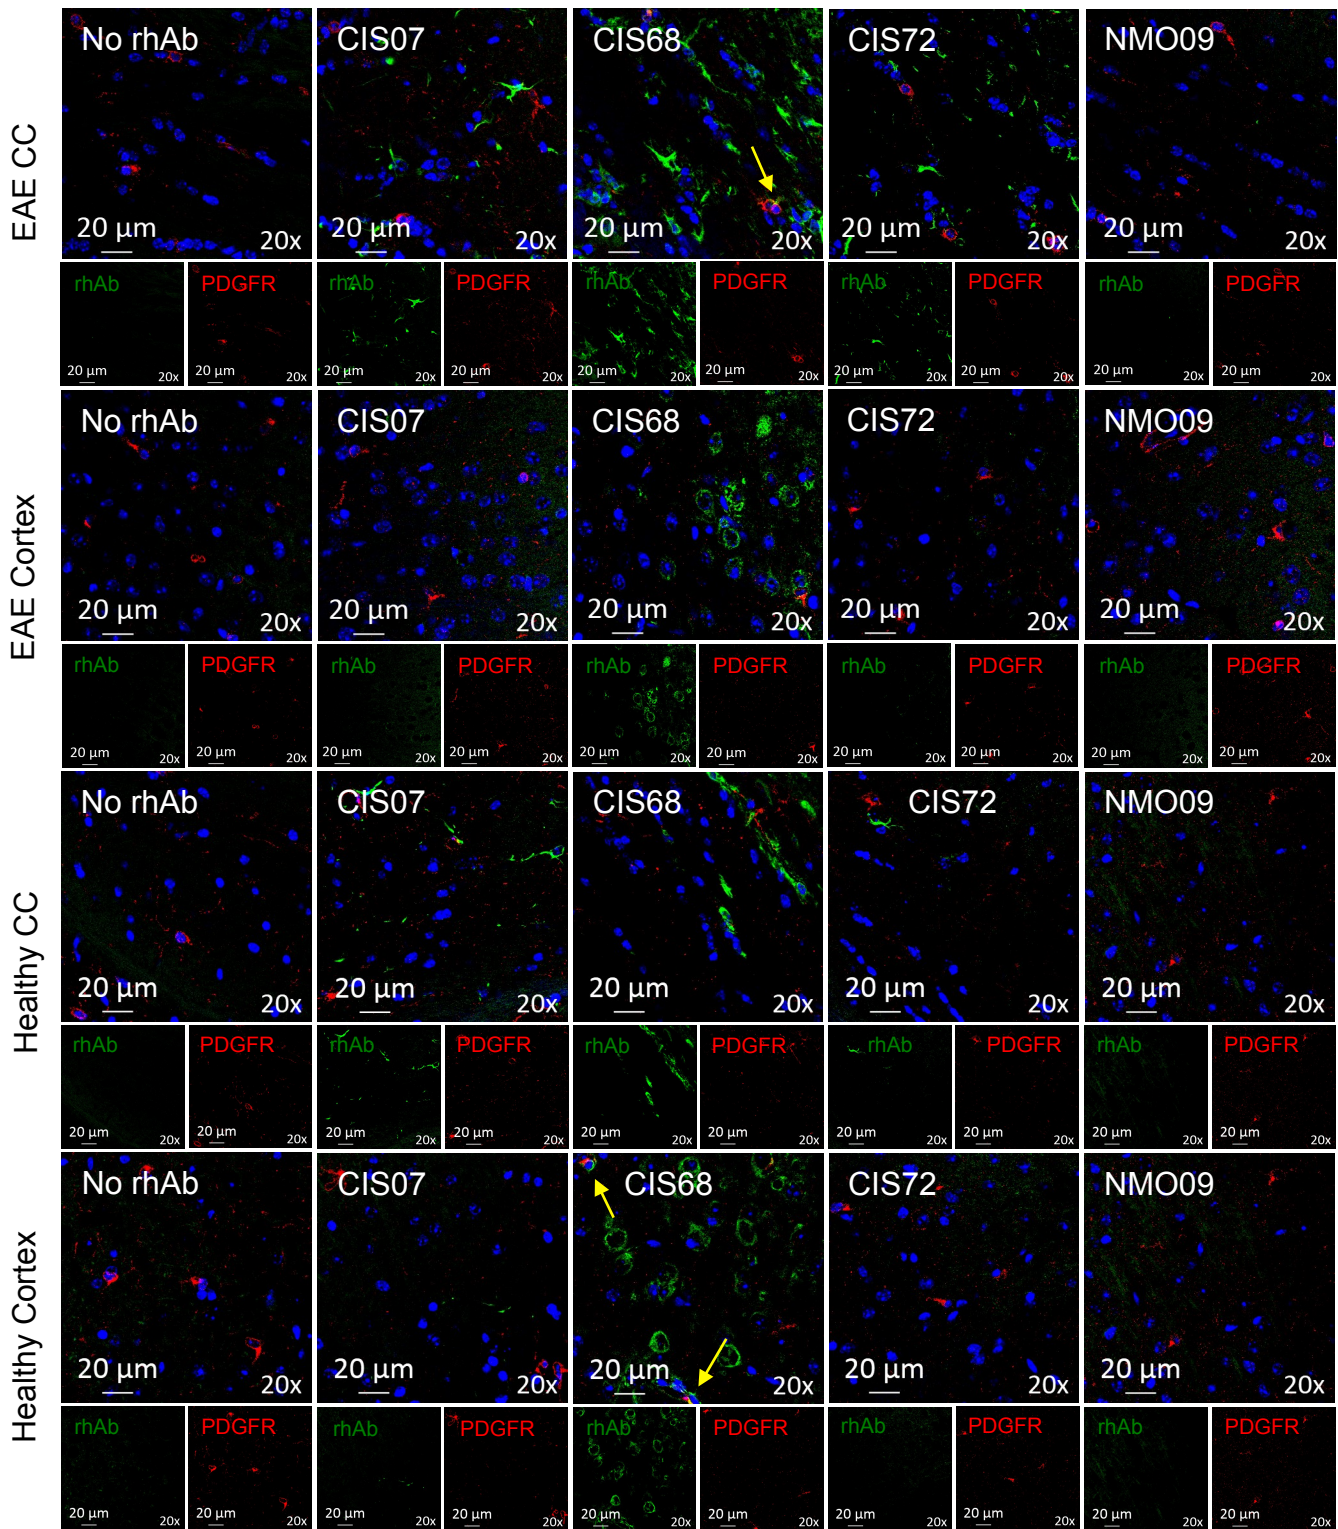

# Supplemental Figure 14: Plasmablast rhAbs binding evaluation by histology

## a. All CIS rhAbs Tested

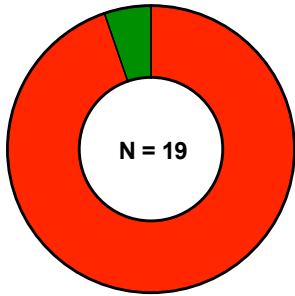

## All NMO rhAbs Tested

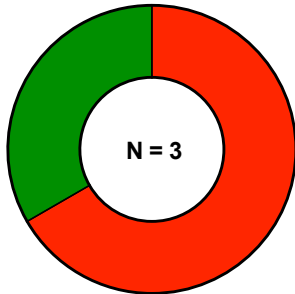

- Neurons and Glial Cells
- Glial Cells Only

## b.

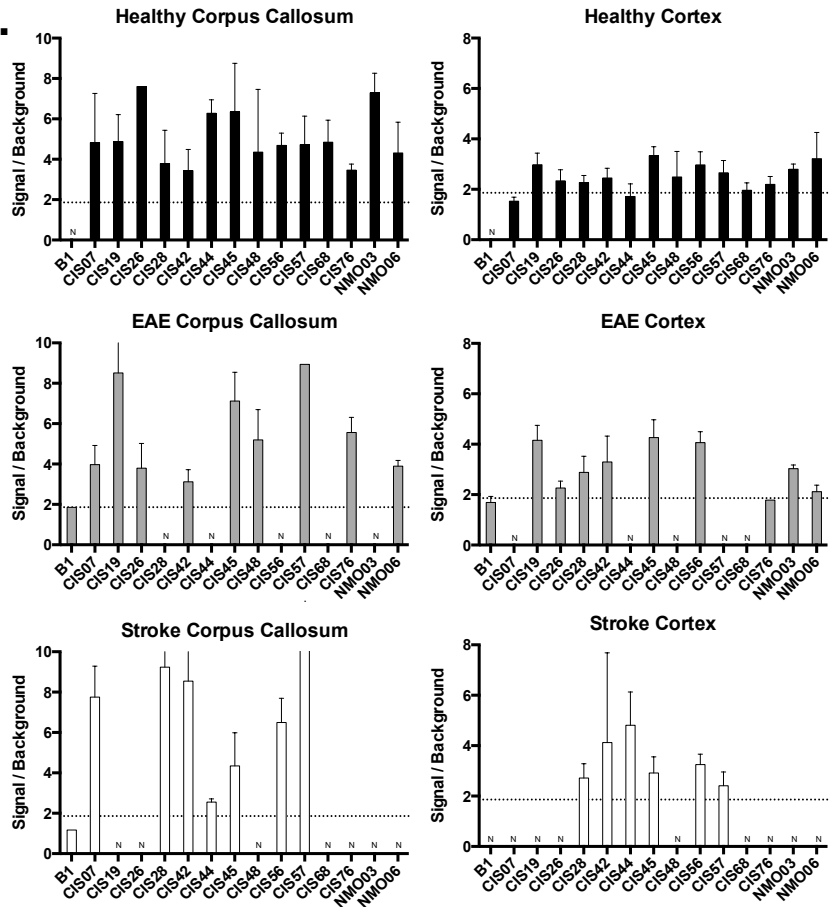

## c.

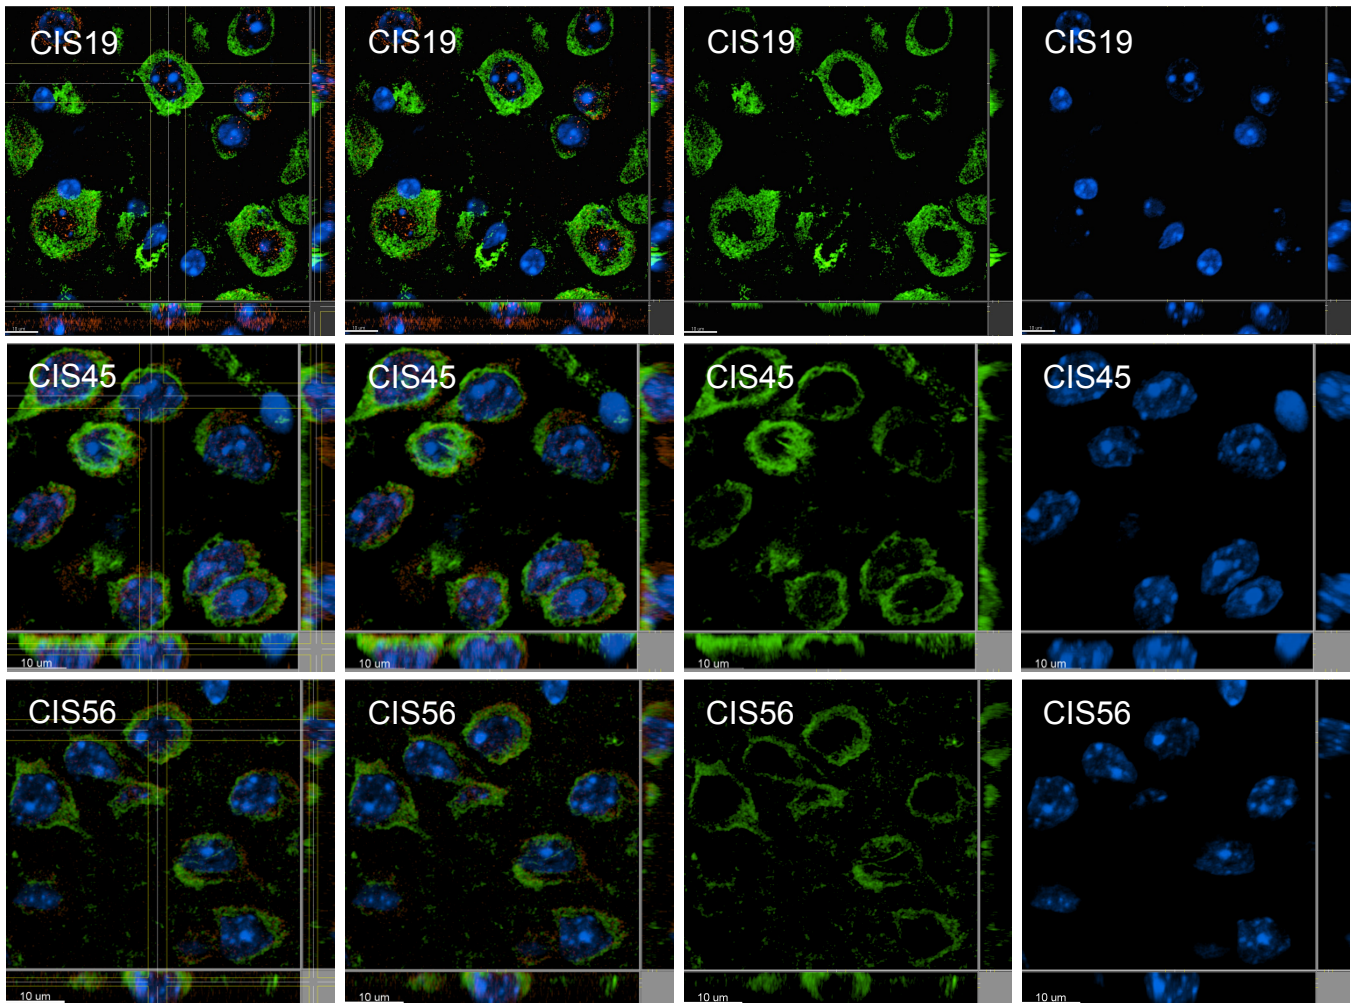



# Supplemental Figure 15: Enumeration of positively stained cells in the cortex

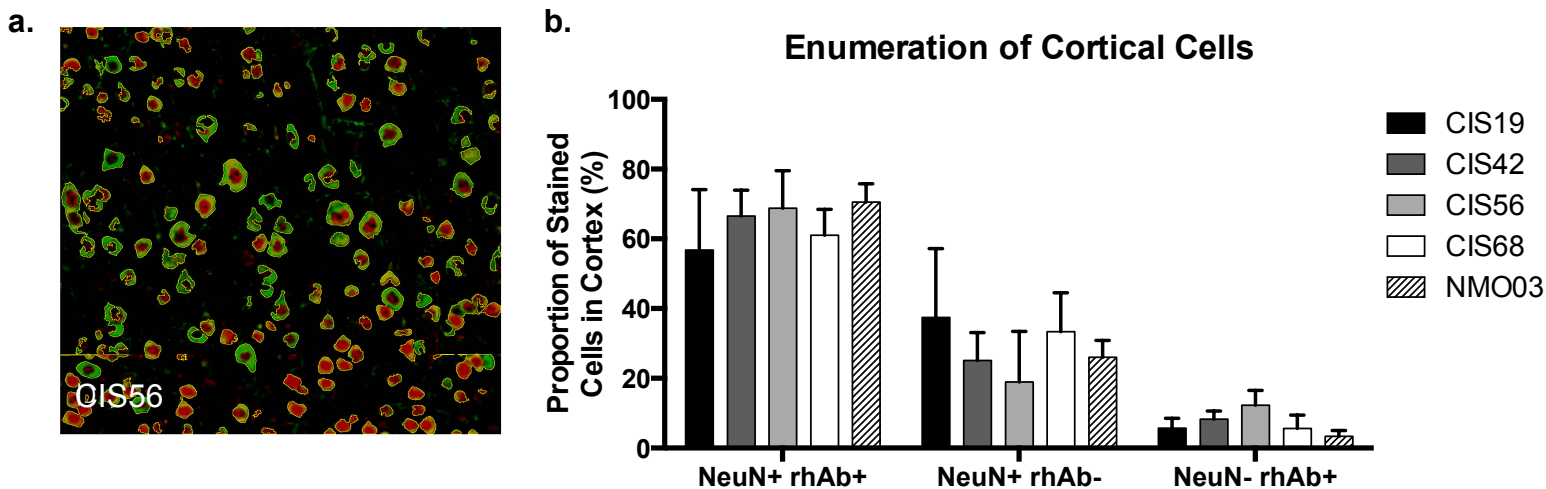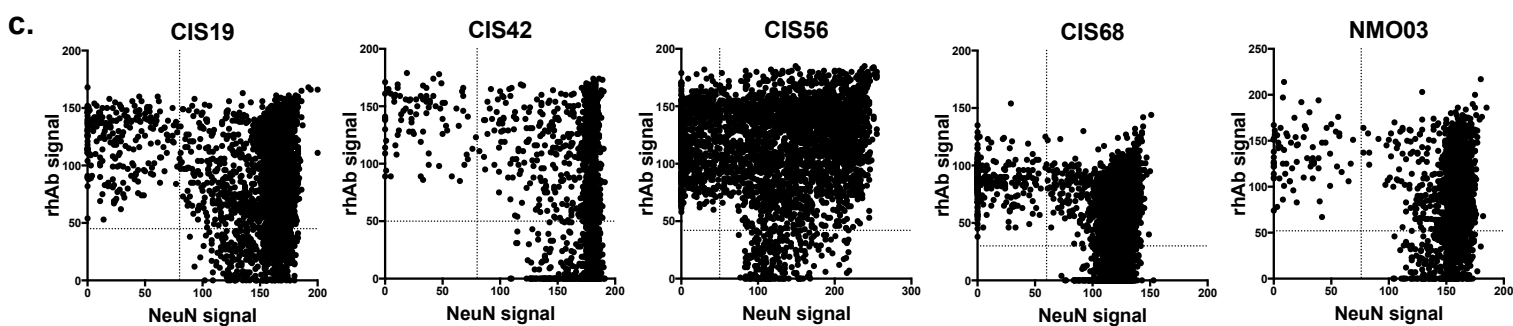

**d.**

| Percent Positive Cells in Cortex by Maximal Signal Intensity |           |         |         |         |         |         |         |
|--------------------------------------------------------------|-----------|---------|---------|---------|---------|---------|---------|
| rhAb                                                         | Channel   | Image 1 | Image 2 | Image 3 | Image 4 | Image 5 | Overall |
| CIS19                                                        | Red+Green | 77.44%  | 54.88%  | 35.27%  | 59.68%  |         | 56.82%  |
|                                                              | Red       | 15.41%  | 39.78%  | 62.84%  | 31.91%  |         | 37.49%  |
|                                                              | Green     | 7.12%   | 5.34%   | 1.89%   | 8.41%   |         | 5.69%   |
| CIS42                                                        | Red+Green | 58.72%  | 59.93%  | 66.98%  | 70.30%  | 76.73%  | 66.53%  |
|                                                              | Red       | 35.68%  | 28.34%  | 25.34%  | 22.35%  | 13.90%  | 25.12%  |
|                                                              | Green     | 5.53%   | 11.66%  | 7.68%   | 7.35%   | 9.31%   | 8.31%   |
| CIS56                                                        | Red+Green | 76.70%  | 76.94%  | 50.68%  | 68.38%  | 71.14%  | 68.77%  |
|                                                              | Red       | 6.56%   | 10.57%  | 43.53%  | 16.14%  | 17.97%  | 18.95%  |
|                                                              | Green     | 16.75%  | 12.49%  | 5.79%   | 15.44%  | 10.89%  | 12.27%  |
| CIS68                                                        | Red+Green | 65.38%  | 56.78%  | 53.03%  | 69.06%  |         | 61.06%  |
|                                                              | Red       | 26.00%  | 40.43%  | 45.16%  | 21.79%  |         | 33.34%  |
|                                                              | Green     | 8.62%   | 2.79%   | 1.78%   | 9.15%   |         | 5.59%   |
| NMO03                                                        | Red+Green | 74.58%  | 77.05%  | 69.72%  | 66.77%  | 64.44%  | 70.51%  |
|                                                              | Red       | 21.24%  | 20.34%  | 28.89%  | 29.95%  | 29.87%  | 26.06%  |
|                                                              | Green     | 4.08%   | 2.61%   | 1.39%   | 3.28%   | 5.69%   | 3.41%   |



Supplemental Figure 16: Plasmablast rhAbs on Sy5y

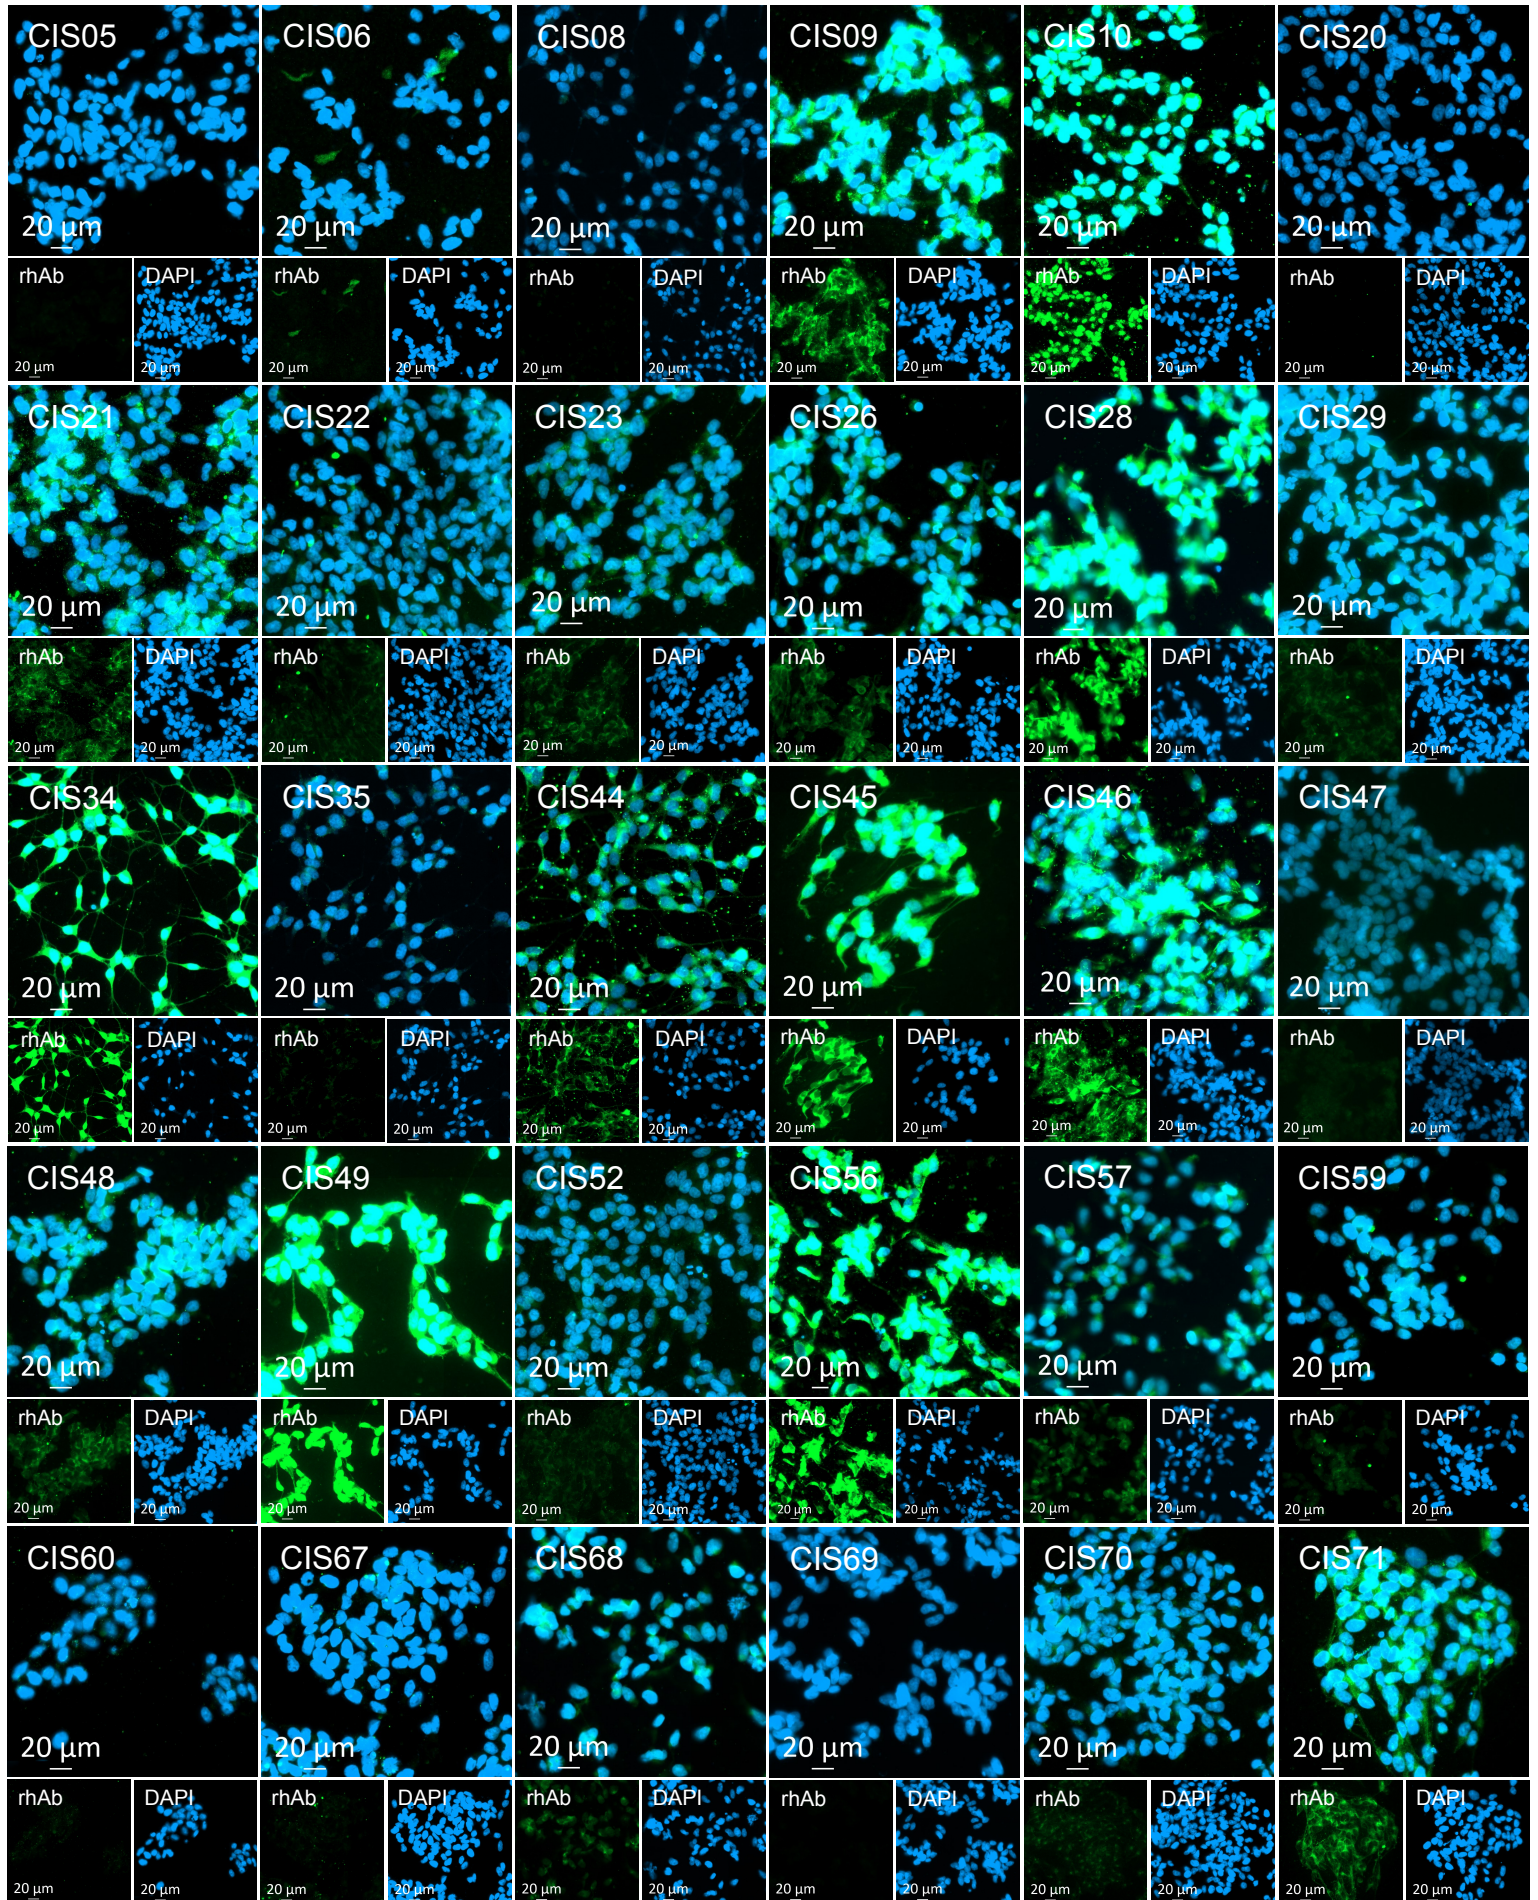



Supplemental Figure 17: Plasmablast rhAbs on Sy5y Continued

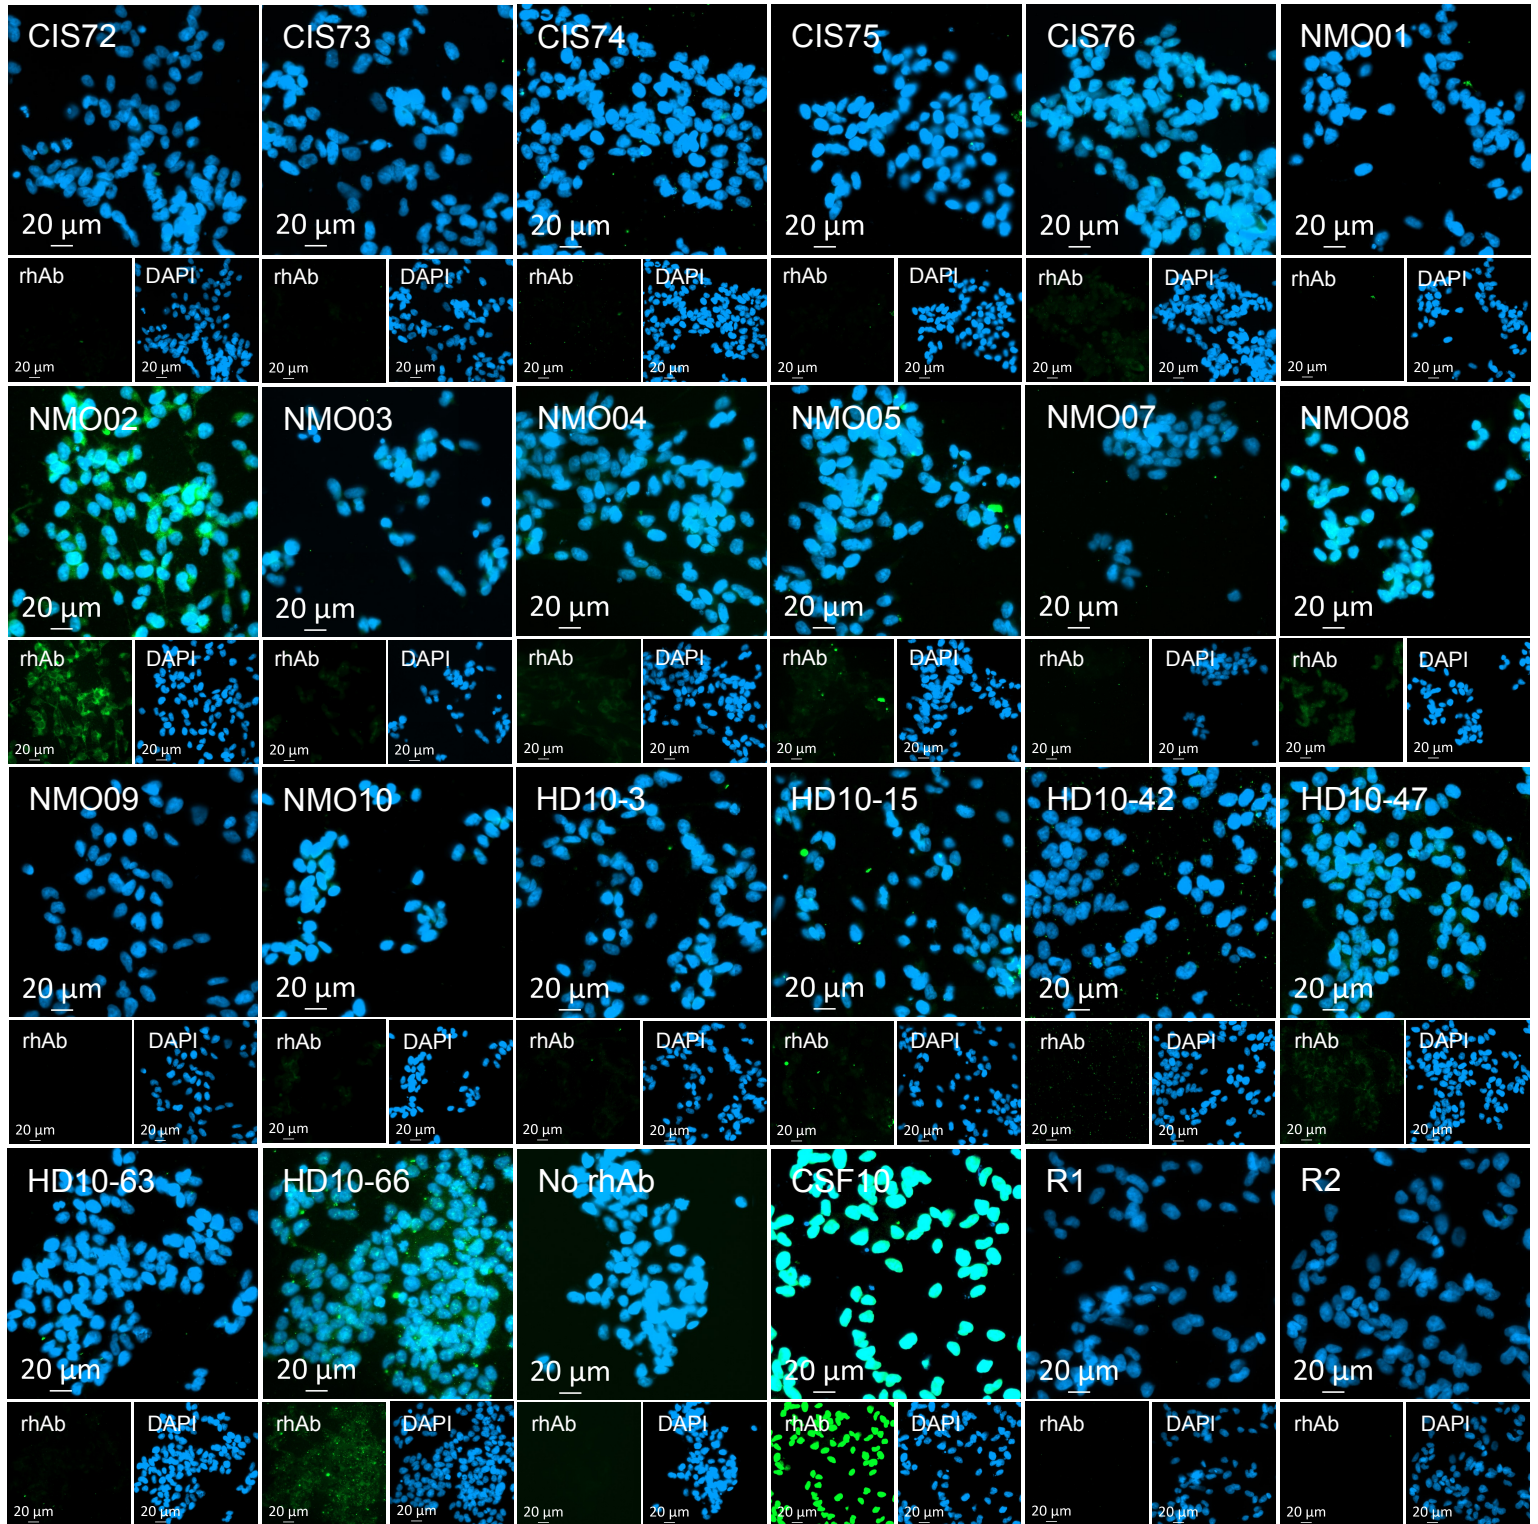



# Supplemental Figure 18: Reactivity to Hep2 by ICC

**a.**

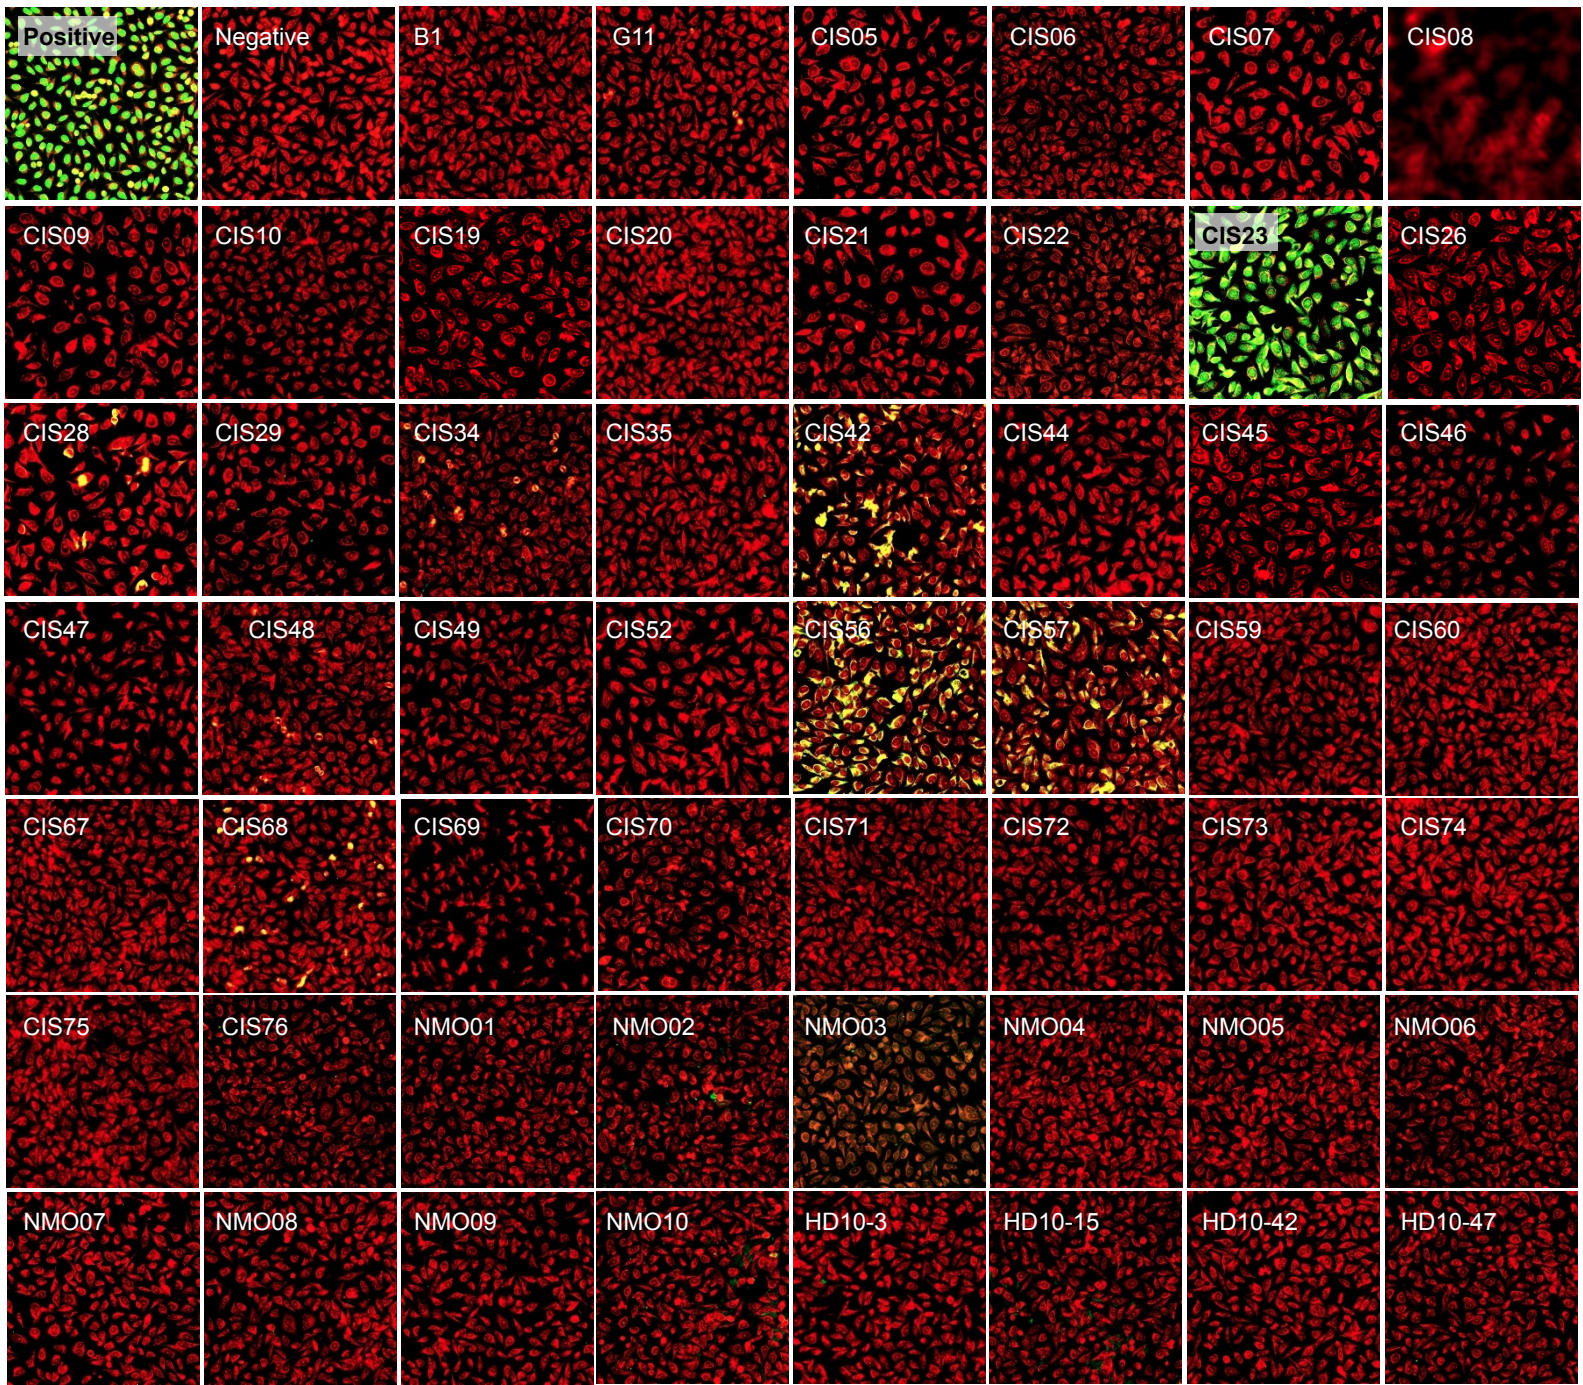

**b.**

**HD rhAbs**

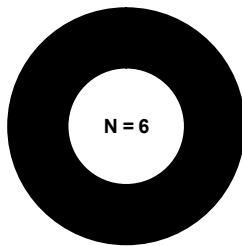

**CIS-PTM rhAbs**

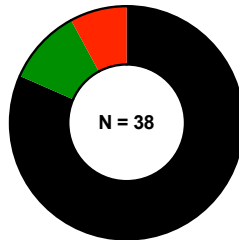

**NMO rhAbs**

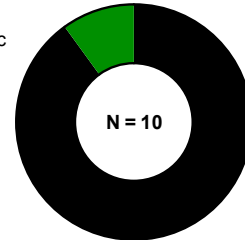

6 Negative

31 Negative  
4 Cytoplasmic  
3 Nuclear

9 Negative  
1 Cytoplasmic

N = 6

N = 38

N = 10

HD10-63

HD10-66



# Supplemental Figure 19: Western Blots of Sy5y and Hep2 Cellular Fractions

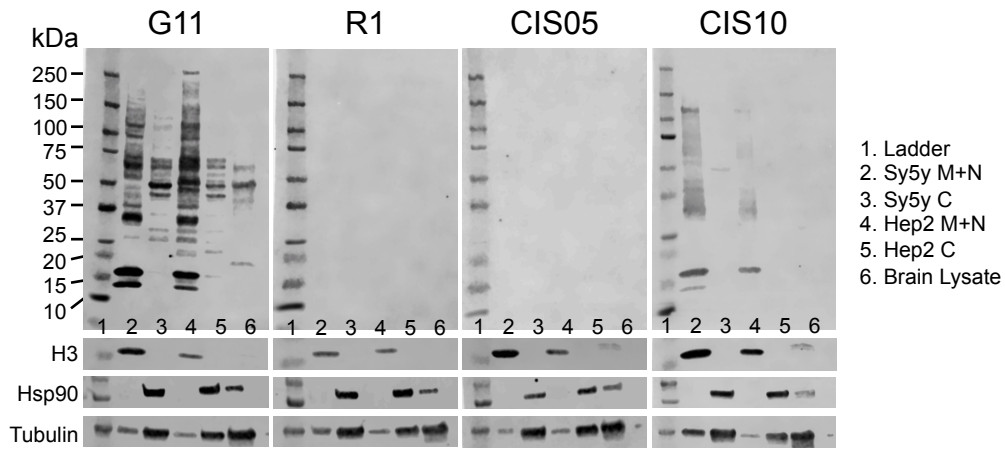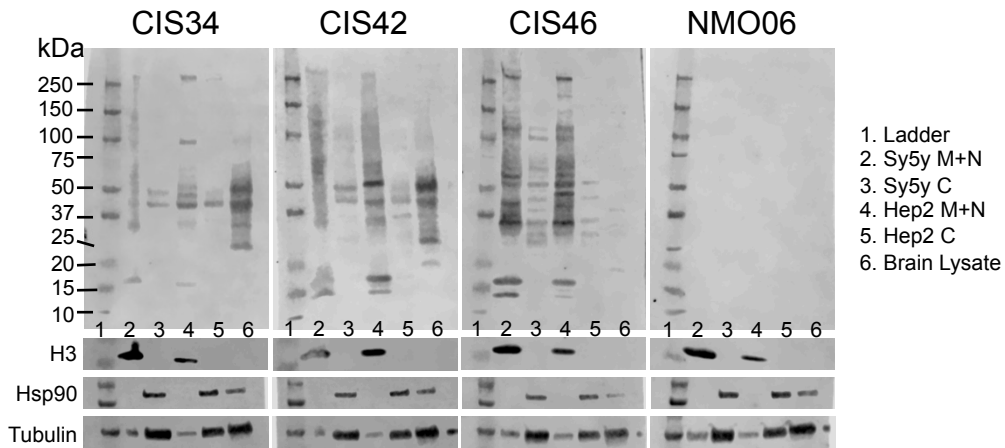

Supplemental Figure 20: Reactivity to Aquaporin-4 by CBA

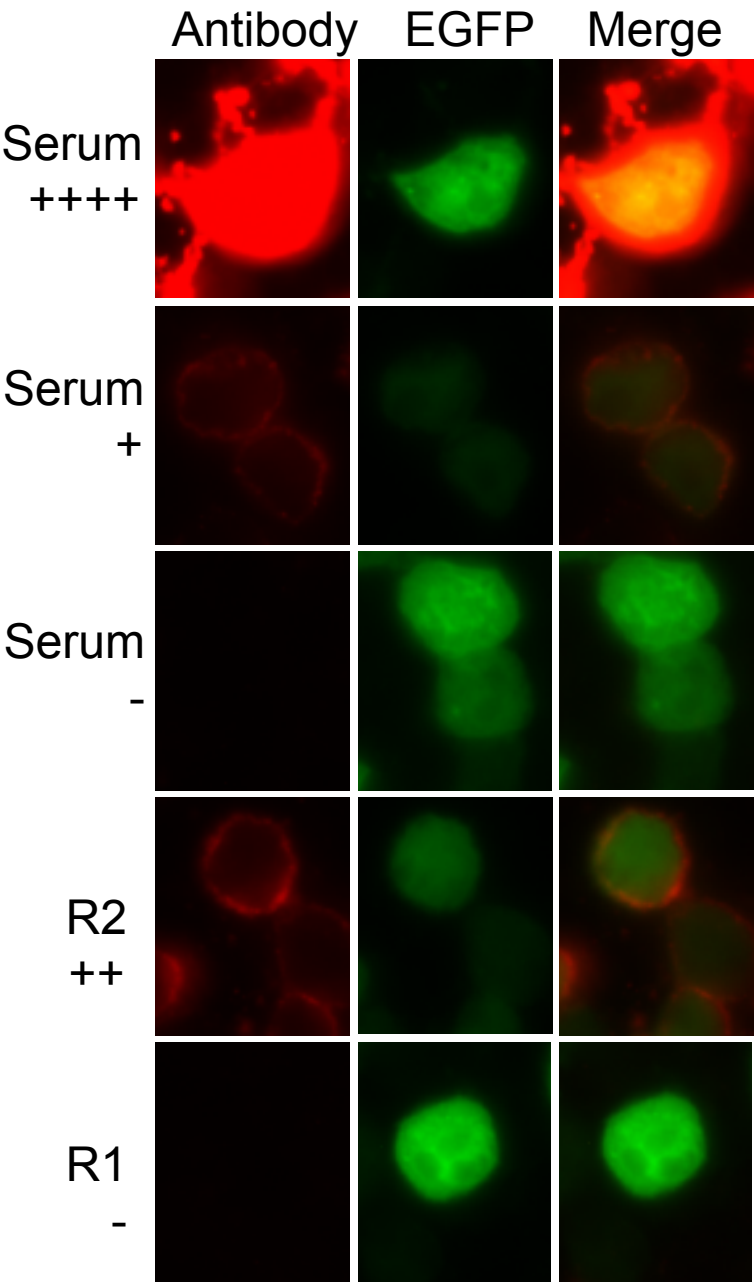

# Supplemental Figure 21: Reactivity to Sy5y by flow cytometry

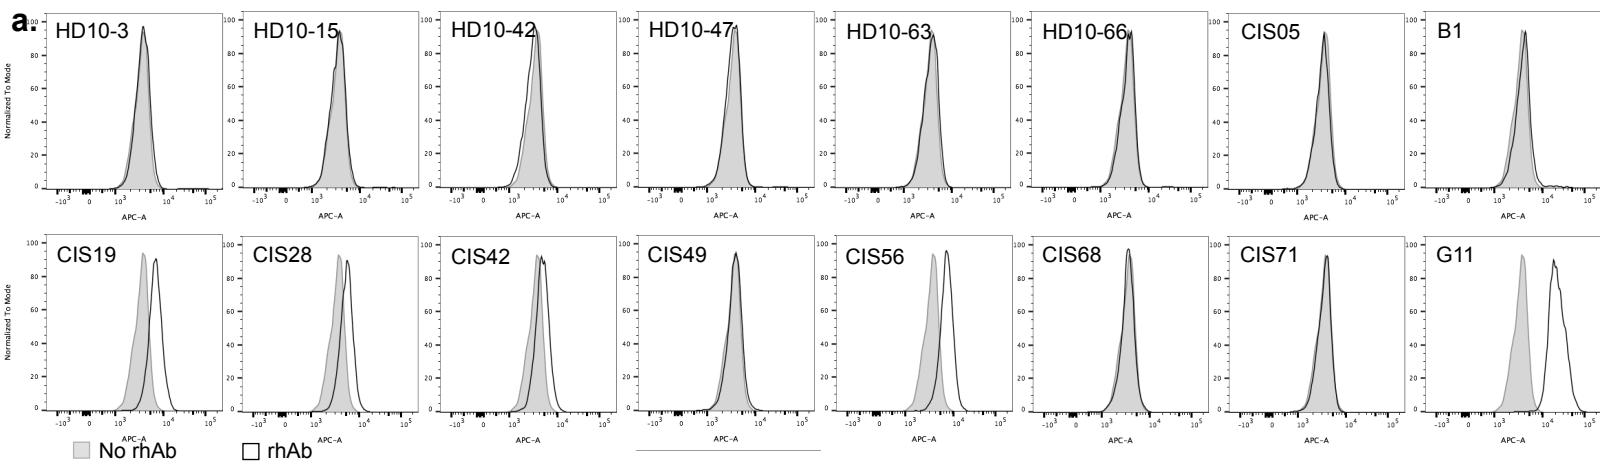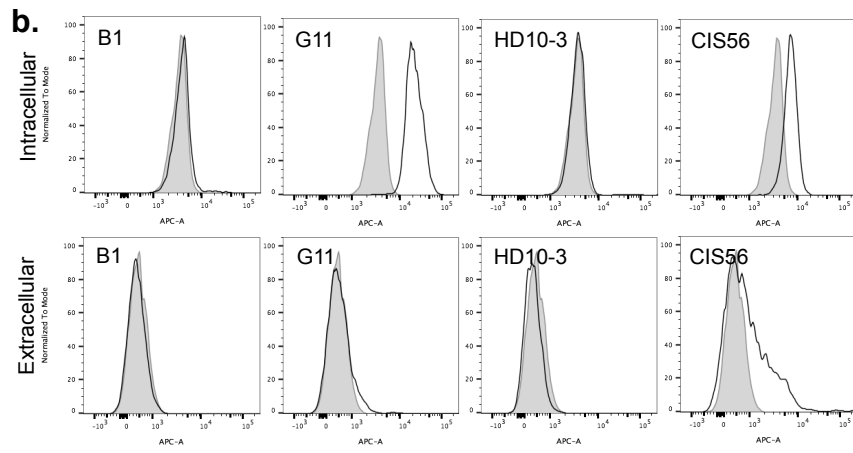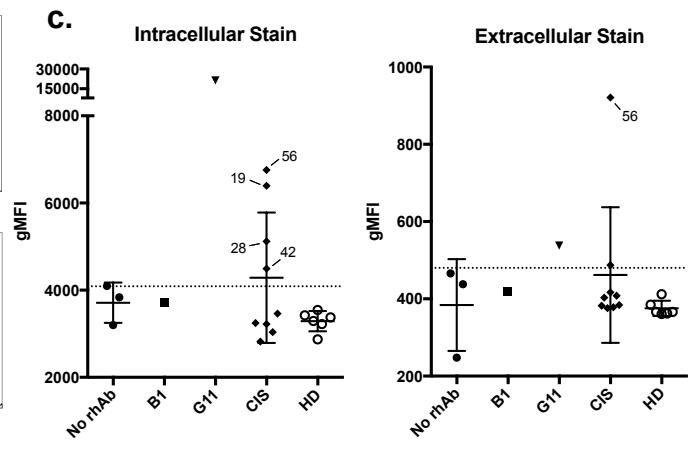

Supplement: NIHMS843753-supplement-Supplemental_Figures.pdf [file NIHMS843753-supplement-Supplemental_Figures.pdf]
