# Supplementary material
Source: PubMed Central journal article supplement (PMC5312707)
Supplement: NIHMS843753-supplement-Supplemental_Table_1.pdf [file NIHMS843753-supplement-Supplemental_Table_1.pdf]

# Supplemental Table 1: Antibody information

| rhAb  | Patient | VH    | JH | VK/L  | JK/L | HC Mut | Isotype | Human Brain ELISA | Mouse Brain ELISA | Mouse Kidney ELISA | Sy5y ELISA | FLU ELISA | OVA ELISA | Sy5y ICC | Hep2 ICC | Stroke Brain | EAE Brain | Healthy Brain | Sy5y FC |
|-------|---------|-------|----|-------|------|--------|---------|-------------------|-------------------|--------------------|------------|-----------|-----------|----------|----------|--------------|-----------|---------------|---------|
| CIS56 | ATM4    | H4-61 | 3  | L5-45 | 7    | 26     | ND      | +                 | +                 | +                  | +          | +         | +         | C        | C        | N+G          | N+G       | N+G           | I+E     |
| CIS57 | ATM4    | H4-59 | 6  | K3-20 | 5    | 17     | ND      | +                 | +                 | +                  | +          | +         | +         | C        | C        | N+G          | N+G       | N+G           |         |
| CIS59 | ATM4    | H4-31 | 4  | K2-24 | 2    | 15     | IgG     | +                 | -                 | -                  | +          | +         | +         | C        | -        | -            | -         | N+G           |         |
| CIS60 | ATM4    | H4-61 | 3  | K2-30 | 2    | 15     | IgM     | +                 | -                 | -                  | +          | -         | -         | -        | -        | -            | -         | N+G           |         |
| CIS45 | CIS111  | H4-59 | 4  | K1-5  | 2    | 31     | IgG     | +                 | +                 | -                  | +          | +         | -         | C        | -        | N+G          | N+G       | N+G           |         |
| CIS46 | CIS111  | H4-34 | 6  | K1-39 | 2    | 22     | IgG     | +                 | -                 | -                  | -          | -         | -         | C        | -        | N+G          | G         | N+G           |         |
| CIS47 | CIS111  | H4-34 | 6  | K4-1  | 5    | 21     | IgG     | -                 | -                 | -                  | -          | -         | -         | -        | -        | -            | N+G       | G             |         |
| CIS48 | CIS111  | H4-39 | 6  | K1-12 | 2    | 20     | ND      | +                 | +                 | +                  | +          | -         | -         | C        | -        | N+G          | G         | G             |         |
| CIS49 | CIS111  | H4-34 | 5  | K1-39 | 5    | 17     | ND      | -                 | -                 | -                  | -          | -         | -         | C        | -        | -            | -         | -             | -       |
| CIS52 | CIS111  | H4-59 | 2  | L1-44 | 7    | 36     | ND      | +                 | -                 | -                  | -          | -         | -         | -        | -        | -            | -         | -             | -       |
| CIS05 | CIS353  | H4-39 | 4  | K3-20 | 5    | 17     | ND      | -                 | -                 | -                  | -          | -         | -         | -        | -        | -            | -         | -             | -       |
| CIS06 | CIS353  | H3-23 | 3  | K4-1  | 3    | 25     | IgG     | -                 | -                 | -                  | -          | -         | -         | -        | -        | -            | -         | -             | -       |
| CIS19 | CIS353  | H4-b  | 3  | K1-5  | 2    | 28     | IgG     | +                 | +                 | -                  | +          | +         | +         | C        | -        | N+G          | N+G       | N+G           | I       |
| CIS20 | CIS353  | H4-59 | 3  | K1-33 | 2    | 18     | IgG     | +                 | -                 | -                  | -          | -         | -         | -        | -        | -            | -         | -             | -       |
| CIS21 | CIS353  | H4-39 | 5  | K3-20 | 5    | 18     | ND      | +                 | -                 | -                  | +          | -         | -         | C        | -        | -            | -         | -             | -       |
| CIS22 | CIS353  | H4-4  | 1  | K1-5  | 2    | 12     | IgG     | +                 | -                 | -                  | -          | -         | -         | C        | -        | -            | -         | -             | -       |
| CIS23 | CIS353  | H3-21 | 4  | K3-20 | 5    | 23     | IgG     | +                 | -                 | -                  | -          | -         | -         | C        | C        | -            | -         | -             | -       |
| CIS26 | CIS353  | H4-b  | 3  | L1-47 | 3    | 28     | IgG     | -                 | +                 | -                  | -          | -         | -         | C        | -        | -            | N+G       | N+G           |         |
| CIS09 | CIS431  | H4-4  | 4  | K3-11 | 5    | 10     | ND      | -                 | -                 | -                  | -          | -         | -         | C        | -        | -            | -         | -             | -       |
| CIS10 | CIS431  | H3-30 | 4  | K1-5  | 4    | 32     | ND      | +                 | -                 | -                  | +          | -         | -         | N        | -        | -            | -         | -             | -       |
| CIS35 | CIS431  | H4-59 | 4  | L2-14 | 1    | 12     | IgM     | -                 | -                 | -                  | -          | -         | -         | -        | -        | -            | -         | N+G           |         |
| CIS42 | CIS431  | H4-30 | 4  | L2-23 | 7    | 15     | ND      | +                 | +                 | +                  | +          | -         | -         | C        | C        | N+G          | N+G       | N+G           | I       |
| CIS44 | CIS431  | H4-59 | 6  | L2-8  | 3    | 20     | ND      | +                 | +                 | -                  | -          | -         | -         | C        | -        | N+G          | -         | N+G           |         |
| CIS07 | CIS683  | H4-59 | 5  | K3-20 | 5    | 26     | IgG     | -                 | -                 | -                  | -          | -         | -         | -        | -        | G            | G         | G             |         |
| CIS08 | CIS683  | H3-23 | 6  | K3-11 | 5    | 22     | ND      | -                 | -                 | -                  | -          | -         | -         | -        | -        | -            | -         | -             | -       |
| CIS28 | CIS683  | H4-59 | 5  | K3-11 | 5    | 8      | IgG     | +                 | +                 | +                  | +          | +         | +         | C        | N        | N+G          | N+G       | N+G           | I       |
| CIS29 | CIS683  | H3-23 | 3  | K1-5  | 2    | 20     | IgG     | +                 | -                 | -                  | -          | -         | -         | C        | -        | -            | -         | -             | -       |
| CIS34 | CIS683  | H4-34 | 4  | L3-10 | 2    | 5      | IgG     | -                 | -                 | -                  | -          | -         | -         | C        | N        | N+G          | N+G       | N+G           |         |
| CIS67 | CIS799  | H4-30 | 4  | K2-30 | 2    | 17     | ND      | -                 | -                 | -                  | -          | -         | -         | -        | -        | -            | -         | -             | -       |
| CIS68 | CIS799  | H4-38 | 4  | K1-5  | 5    | 16     | ND      | +                 | +                 | -                  | +          | -         | -         | C        | N        | N+G          | N+G       | N+G           | -       |
| CIS69 | CIS799  | H4-30 | 6  | K1-27 | 5    | 11     | ND      | -                 | -                 | -                  | -          | -         | -         | -        | -        | -            | -         | -             | -       |
| CIS70 | CIS799  | H3-30 | 4  | K3-20 | 5    | 31     | IgG     | -                 | -                 | -                  | -          | -         | -         | -        | -        | -            | -         | -             | -       |
| CIS76 | CIS799  | H4-39 | 2  | L6-57 | 3    | 23     | ND      | -                 | +                 | -                  | -          | -         | -         | -        | -        | N+G          | N+G       | N+G           |         |
| CIS71 | CIS924  | H4-4  | 5  | K1-9  | 2    | 19     | IgG     | -                 | -                 | -                  | -          | -         | -         | C        | -        | -            | -         | -             | -       |
| CIS72 | CIS924  | H4-34 | 6  | L2-14 | 2    | 13     | ND      | -                 | -                 | -                  | -          | -         | -         | -        | -        | G            | N+G       | G             |         |
| CIS73 | CIS924  | H4-31 | 4  | K1-12 | 2    | 12     | IgG     | -                 | -                 | -                  | -          | -         | -         | -        | -        | N+G          | G         | G             |         |
| CIS74 | CIS924  | H3-30 | 4  | K1-39 | 5    | 26     | IgM     | -                 | -                 | -                  | -          | -         | -         | -        | -        | -            | -         | -             | -       |
| CIS75 | CIS924  | H3-23 | 5  | K1-17 | 5    | 20     | ND      | -                 | -                 | -                  | -          | -         | -         | -        | -        | -            | -         | -             | -       |
| NMO01 | NMO.01  | H4-30 | 5  | L2-8  | 2    | 27     | IgG     | -                 | -                 | -                  | -          | -         | -         | -        | -        | -            | -         | -             | -       |
| NMO02 | NMO.01  | H4-39 | 4  | K1-5  | 2    | 7      | IgM     | -                 | -                 | -                  | -          | -         | -         | C        | -        | -            | -         | -             | I       |
| NMO03 | NMO.01  | H4-39 | 4  | L2-23 | 2    | 6      | IgM     | +                 | +                 | -                  | +          | -         | -         | -        | C        | N+G          | N+G       | N+G           |         |
| NMO04 | NMO.01  | H4-39 | 4  | L2-23 | 2    | 1      | IgM     | -                 | -                 | -                  | -          | -         | -         | -        | -        | -            | -         | -             | -       |
| NMO05 | NMO.01  | H3-7  | 3  | K2-30 | 2    | 23     | IgM     | -                 | -                 | -                  | -          | -         | -         | -        | -        | -            | -         | -             | -       |
| NMO06 | NMO.02  | H4-59 | 6  | L6-57 | 3    | 9      | IgG     | +                 | +                 | +                  | +          | +         | -         | N        | -        | N+G          | N+G       | N+G           | -       |
| NMO07 | NMO.07  | H4-4  | 6  | K3-20 | 4    | 11     | IgG     | -                 | -                 | -                  | -          | -         | -         | -        | -        | -            | -         | -             | -       |
| NMO08 | NMO.07  | H3-30 | 6  | K2-28 | 2    | 12     | IgG     | -                 | -                 | -                  | -          | -         | -         | C        | -        | -            | -         | -             | -       |
| NMO09 | NMO.08  | H4-31 | 4  | K3-20 | 2    | 33     | IgM     | -                 | -                 | -                  | -          | -         | -         | -        | -        | G            | G         | G             |         |
| NMO10 | NMO.08  | H4-39 | 3  | K3-15 | 2    | 15     | ND      | +                 | -                 | -                  | +          | -         | -         | -        | -        | -            | -         | -             | -       |

**Bold = VH4 antibodies**

Thin = VH3 antibodies

White = VK antibodies

Gray = VL antibodies

ND = Not Detectable

+ = Positive  
- = Negative  
Blank = not tested

N = Nuclear  
C = Cytoplasmic

N = Neurons  
G = Glia  
I = Intracellular  
E = Extracellular
